# Supplementary material for: Citreobenzofuran D–F and Phomenone A–B: Five Novel Sesquiterpenoids from the Mangrove-Derived Fungus Penicillium sp. HDN13-494
Source: MDPI journal article supplement (doi:10.3390/md20020137), 2022-02-13
Supplement: s1 [file s1]

## Supporting Information

### **Citreobenzofuran D–F and Phomenone A–B: Five Novel Sesquiterpenoids from the Mangrove Endophytic Fungus *Penicillium* sp. HDN13-494**

**Qian Wu<sup>1</sup>, Yiming Chang<sup>1</sup>, Qian Che<sup>1</sup>, Guojian Zhang<sup>1,2</sup>, Dehai Li<sup>1,2</sup> and Tianjiao Zhu<sup>1,2,\*</sup>**

<sup>1</sup> Key Laboratory of Marine Drugs, Chinese Ministry of Education, School of Medicine and Pharmacy, Ocean University of China, Qingdao 266003, China

<sup>2</sup> Laboratory for Marine Drugs and Bioproducts, Pilot National Laboratory for Marine Science and Technology (Qingdao), Qingdao 266237, China

\* Correspondence: zhutj@ouc.edu.cn; Tel.: +86-532-82031632; Fax: +86-532-8203-3054

## Table of Contents

|                                                                                                                                                                                                                                                                                             |    |
|---------------------------------------------------------------------------------------------------------------------------------------------------------------------------------------------------------------------------------------------------------------------------------------------|----|
| <b>Figure S1.</b> HPLC analysis of the crude extract of <i>Penicillium</i> sp. HDN13-494. ....                                                                                                                                                                                              | 4  |
| <b>Figure S2.</b> <sup>1</sup> H NMR (500 MHz, DMSO) spectrum of compound <b>1</b> . ....                                                                                                                                                                                                   | 4  |
| <b>Figure S3.</b> <sup>13</sup> C NMR (125 MHz, DMSO) spectrum of compound <b>1</b> . ....                                                                                                                                                                                                  | 4  |
| <b>Figure S4.</b> HSQC spectrum of compound <b>1</b> . ....                                                                                                                                                                                                                                 | 5  |
| <b>Figure S5.</b> <sup>1</sup> H- <sup>1</sup> H COSY (500 MHz, DMSO) spectrum of compound <b>1</b> . ....                                                                                                                                                                                  | 5  |
| <b>Figure S6.</b> HMBC spectrum of compound <b>1</b> . ....                                                                                                                                                                                                                                 | 6  |
| <b>Figure S7.</b> NOESY (400 MHz, DMSO) spectrum of compound <b>1</b> . ....                                                                                                                                                                                                                | 6  |
| <b>Figure S8.</b> The HRESIMS spectrum of compound <b>1</b> . ....                                                                                                                                                                                                                          | 7  |
| <b>Figure S9.</b> The IR spectrum of compound <b>1</b> . ....                                                                                                                                                                                                                               | 8  |
| <b>Figure S10.</b> <sup>1</sup> H NMR (500 MHz, DMSO) spectrum of compound <b>2</b> . ....                                                                                                                                                                                                  | 8  |
| <b>Figure S11.</b> <sup>13</sup> C NMR (100 MHz, DMSO) spectrum of compound <b>2</b> . ....                                                                                                                                                                                                 | 8  |
| <b>Figure S12.</b> HSQC spectrum of compound <b>2</b> . ....                                                                                                                                                                                                                                | 9  |
| <b>Figure S13.</b> <sup>1</sup> H- <sup>1</sup> H COSY (500 MHz, DMSO) spectrum of compound <b>2</b> . ....                                                                                                                                                                                 | 9  |
| <b>Figure S14.</b> HMBC spectrum of compound <b>2</b> . ....                                                                                                                                                                                                                                | 10 |
| <b>Figure S15.</b> The HRESIMS spectrum of compound <b>2</b> . ....                                                                                                                                                                                                                         | 10 |
| <b>Figure S16.</b> The IR spectrum of compound <b>2</b> . ....                                                                                                                                                                                                                              | 11 |
| <b>Figure S17.</b> <sup>1</sup> H NMR (400 MHz, DMSO) spectrum of compound <b>3</b> . ....                                                                                                                                                                                                  | 11 |
| <b>Figure S18.</b> <sup>13</sup> C NMR (125 MHz, DMSO) spectrum of compound <b>3</b> . ....                                                                                                                                                                                                 | 12 |
| <b>Figure S19.</b> HSQC spectrum of compound <b>3</b> . ....                                                                                                                                                                                                                                | 12 |
| <b>Figure S20.</b> <sup>1</sup> H- <sup>1</sup> H COSY (500 MHz, DMSO) spectrum of compound <b>3</b> . ....                                                                                                                                                                                 | 13 |
| <b>Figure S21.</b> HMBC spectrum of compound <b>3</b> . ....                                                                                                                                                                                                                                | 13 |
| <b>Figure S22.</b> The HRESIMS spectrum of compound <b>3</b> . ....                                                                                                                                                                                                                         | 14 |
| <b>Figure S23.</b> The IR spectrum of compound <b>3</b> . ....                                                                                                                                                                                                                              | 14 |
| <b>Figure S24.</b> <sup>1</sup> H NMR (500 MHz, DMSO) spectrum of compound <b>4</b> . ....                                                                                                                                                                                                  | 15 |
| <b>Figure S25.</b> <sup>13</sup> C NMR (125 MHz, DMSO) spectrum of compound <b>4</b> . ....                                                                                                                                                                                                 | 15 |
| <b>Figure S26.</b> HSQC spectrum of compound <b>4</b> . ....                                                                                                                                                                                                                                | 16 |
| <b>Figure S27.</b> <sup>1</sup> H- <sup>1</sup> H COSY (500 MHz, DMSO) spectrum of compound <b>4</b> . ....                                                                                                                                                                                 | 17 |
| <b>Figure S28.</b> HMBC spectrum of compound <b>4</b> . ....                                                                                                                                                                                                                                | 17 |
| <b>Figure S29.</b> NOESY (500 MHz, DMSO) spectrum of compound <b>4</b> . ....                                                                                                                                                                                                               | 18 |
| <b>Figure S30.</b> The HRESIMS spectrum of compound <b>4</b> . ....                                                                                                                                                                                                                         | 18 |
| <b>Figure S31.</b> The IR spectrum of compound <b>4</b> . ....                                                                                                                                                                                                                              | 19 |
| <b>Figure S32.</b> <sup>1</sup> H NMR (500 MHz, DMSO) spectrum of compound <b>5</b> . ....                                                                                                                                                                                                  | 19 |
| <b>Figure S33.</b> <sup>13</sup> C NMR (125 MHz, DMSO) spectrum of compound <b>5</b> . ....                                                                                                                                                                                                 | 19 |
| <b>Figure S34.</b> HSQC spectrum of compound <b>5</b> . ....                                                                                                                                                                                                                                | 20 |
| <b>Figure S35.</b> <sup>1</sup> H- <sup>1</sup> H COSY (500 MHz, DMSO) spectrum of compound <b>5</b> . ....                                                                                                                                                                                 | 20 |
| <b>Figure S36.</b> HMBC spectrum of compound <b>5</b> . ....                                                                                                                                                                                                                                | 21 |
| <b>Figure S37.</b> NOESY (500 MHz, DMSO) spectrum of compound <b>5</b> . ....                                                                                                                                                                                                               | 21 |
| <b>Figure S38.</b> The HRESIMS spectrum of compound <b>5</b> . ....                                                                                                                                                                                                                         | 22 |
| <b>Figure S39.</b> The IR spectrum of compound <b>5</b> . ....                                                                                                                                                                                                                              | 22 |
| <b>Figure S40.</b> DFT-optimized structures for low-energy conformers of (1 <i>R</i> , 4 <i>S</i> , 5 <i>R</i> )- <b>1</b> at B3LYP/TZVP level in DMSO (CPCM) (Conformer populations were calculated using the Gibbs free energy and Boltzmann population at 298 K estimated thereof). .... | 23 |
| <b>Figure S41.</b> DFT-optimized structures for low-energy conformers of (4 <i>R</i> )- <b>2</b> at B3LYP/TZVP level                                                                                                                                                                        |    |

|                                                                                                                                                                                                                                                                                                        |    |
|--------------------------------------------------------------------------------------------------------------------------------------------------------------------------------------------------------------------------------------------------------------------------------------------------------|----|
| in DMSO (CPCM) (Conformer populations were calculated using the Gibbs free energy and Boltzmann population at 298 K estimated thereof). .....                                                                                                                                                          | 23 |
| <b>Figure S42.</b> DFT-optimized structures for low-energy conformers of (4 <i>R</i> )- <b>3</b> at B3LYP/TZVP level in DMSO (CPCM) (Conformer populations were calculated using the Gibbs free energy and Boltzmann population at 298 K estimated thereof). .....                                     | 24 |
| <b>Figure S43.</b> DFT-optimized structures for low-energy conformers of (4 <i>R</i> )- <b>4</b> at B3LYP/TZVP level in DMSO (CPCM) (Conformer populations were calculated using the Gibbs free energy and Boltzmann population at 298 K estimated thereof). .....                                     | 25 |
| <b>Figure S44.</b> DFT-optimized structures for low-energy conformers of (4 <i>S</i> ,5 <i>R</i> ,6 <i>R</i> ,7 <i>R</i> )- <b>5</b> at B3LYP/TZVP level in DMSO (CPCM) (Conformer populations were calculated using the Gibbs free energy and Boltzmann population at 298 K estimated thereof). ..... | 26 |
| <b>Table S1.</b> Harmonic frequencies (cm <sup>-1</sup> ) of <b>1</b> .....                                                                                                                                                                                                                            | 27 |
| <b>Table S2.</b> Harmonic frequencies (cm <sup>-1</sup> ) of <b>2</b> .....                                                                                                                                                                                                                            | 27 |
| <b>Table S3.</b> Harmonic frequencies (cm <sup>-1</sup> ) of <b>3</b> .....                                                                                                                                                                                                                            | 27 |
| <b>Table S4.</b> Harmonic frequencies (cm <sup>-1</sup> ) of <b>4</b> .....                                                                                                                                                                                                                            | 27 |
| <b>Table S5.</b> Harmonic frequencies (cm <sup>-1</sup> ) of <b>5</b> .....                                                                                                                                                                                                                            | 28 |
| <b>Table S6.</b> Important thermodynamic parameters (a.u.) and Boltzmann distributions of the optimized- <b>1</b> at B3LYP/TZVP level of theory with PCM solvent model for DMSO. ....                                                                                                                  | 28 |
| <b>Table S7.</b> Important thermodynamic parameters (a.u.) and Boltzmann distributions of the optimized- <b>2</b> at B3LYP/TZVP level of theory with PCM solvent model for DMSO. ....                                                                                                                  | 28 |
| <b>Table S8.</b> Important thermodynamic parameters (a.u.) and Boltzmann distributions of the optimized- <b>3</b> at B3LYP/TZVP level of theory with PCM solvent model for DMSO. ....                                                                                                                  | 28 |
| <b>Table S9.</b> Important thermodynamic parameters (a.u.) and Boltzmann distributions of the optimized- <b>4</b> at B3LYP/TZVP level of theory with PCM solvent model for DMSO. ....                                                                                                                  | 28 |
| <b>Table S10.</b> Important thermodynamic parameters (a.u.) and Boltzmann distributions of the optimized- <b>5</b> at B3LYP/TZVP level of theory with PCM solvent model for DMSO. ....                                                                                                                 | 29 |

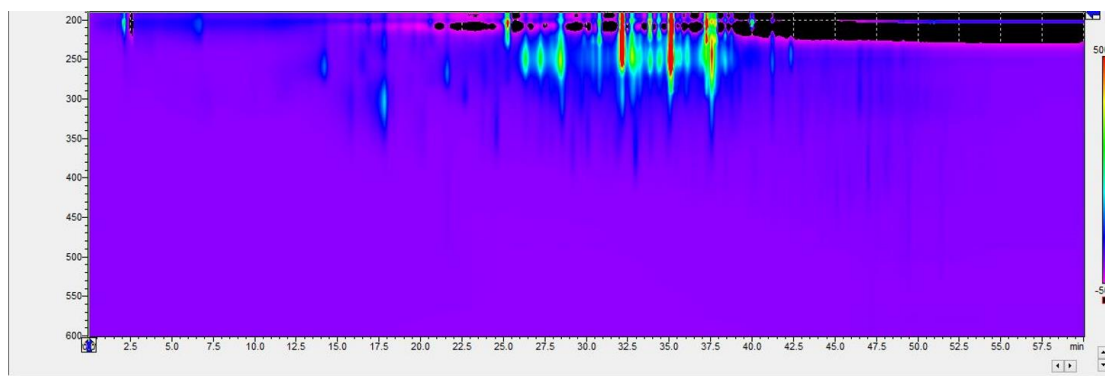

**Figure S1.** HPLC analysis of the crude extract of *Penicillium* sp. HDN13-494.

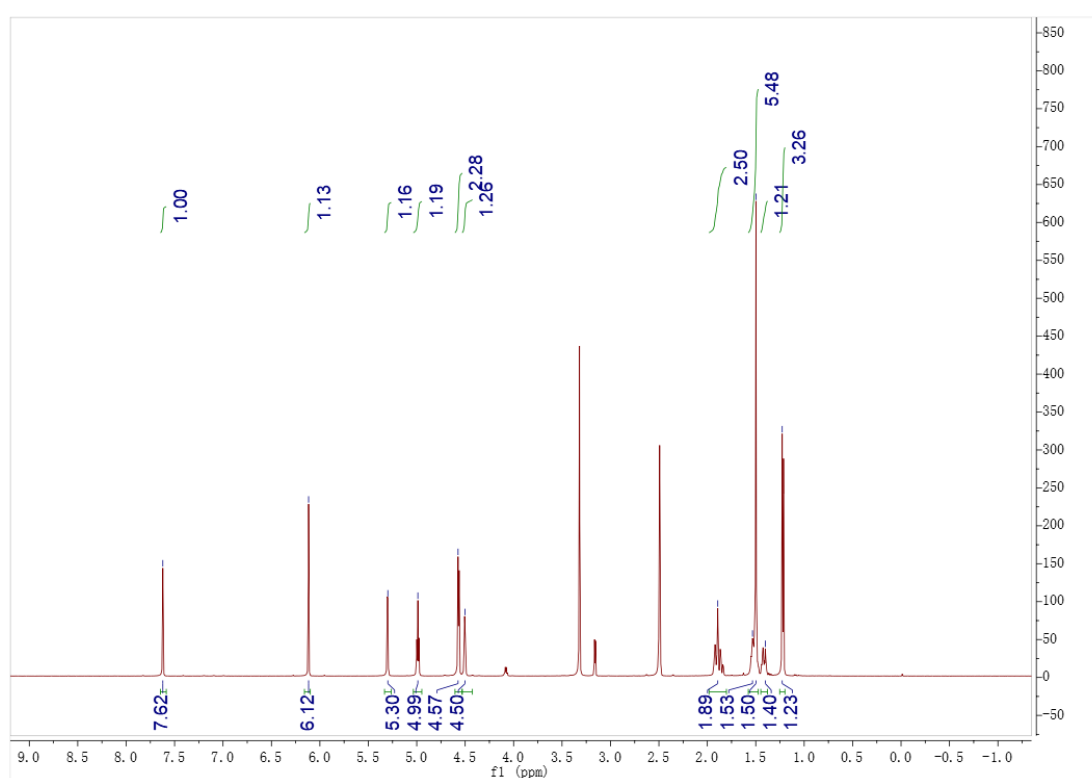

**Figure S2.**  $^1\text{H}$  NMR (500 MHz, DMSO) spectrum of compound **1**.

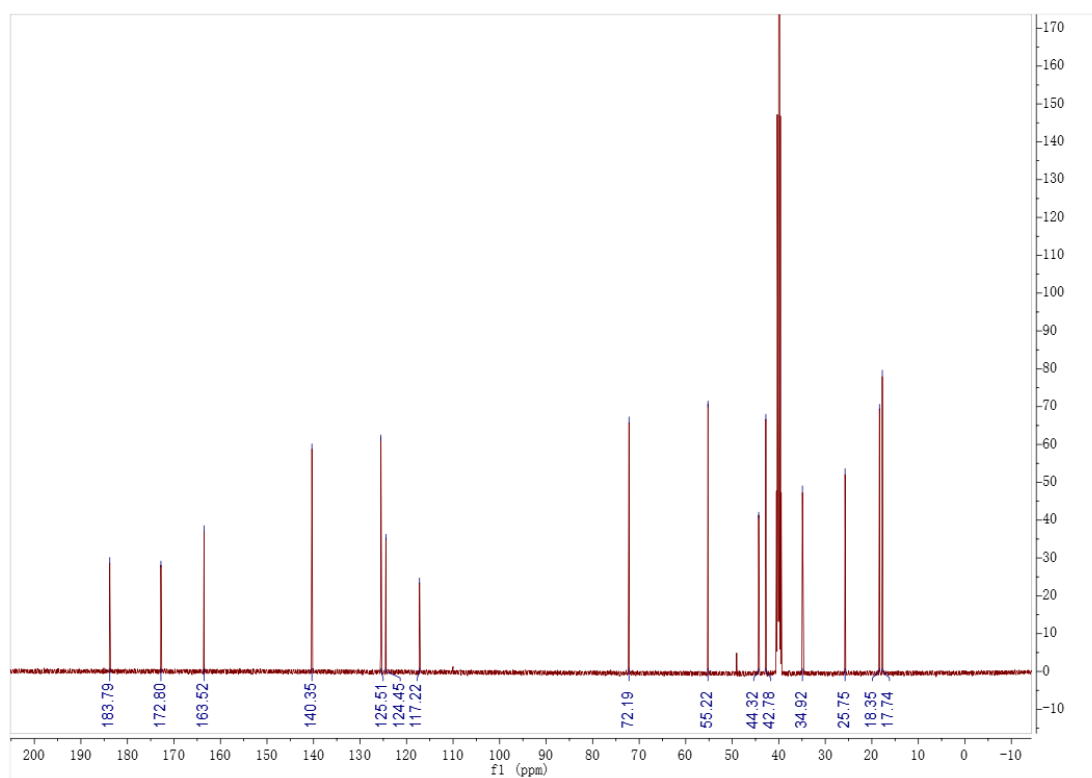

**Figure S3.** <sup>13</sup>C NMR (125 MHz, DMSO) spectrum of compound **1**.

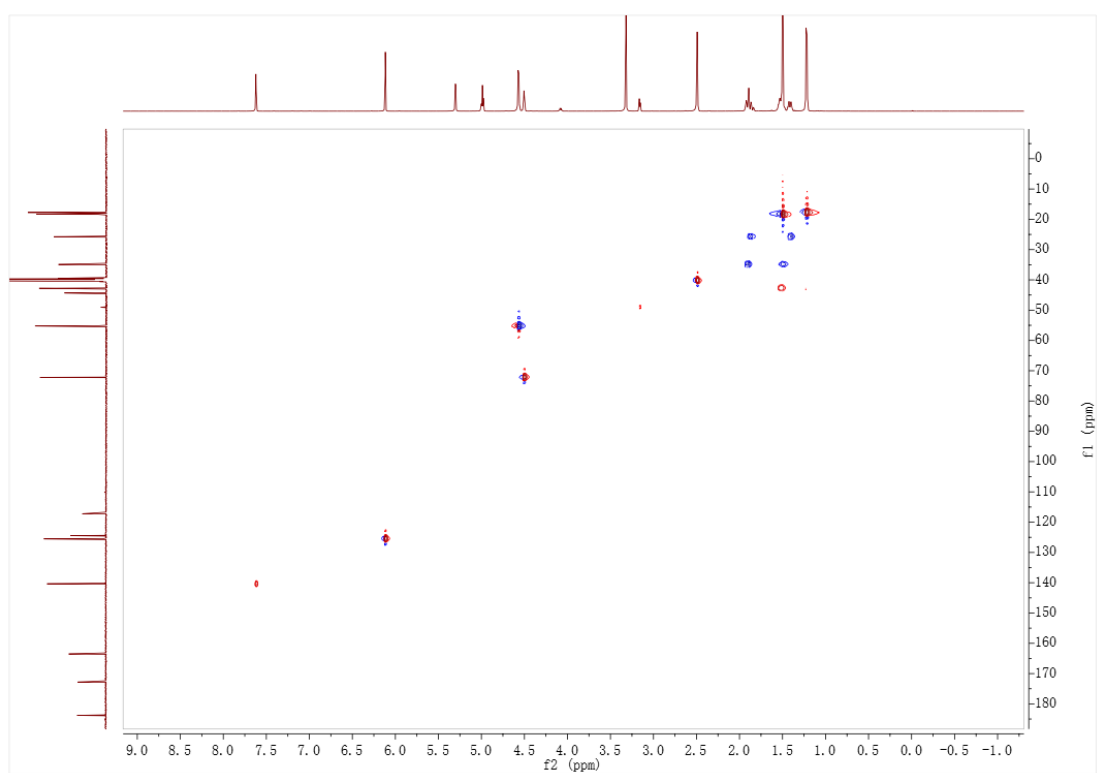

**Figure S4.** HSQC spectrum of compound **1**.

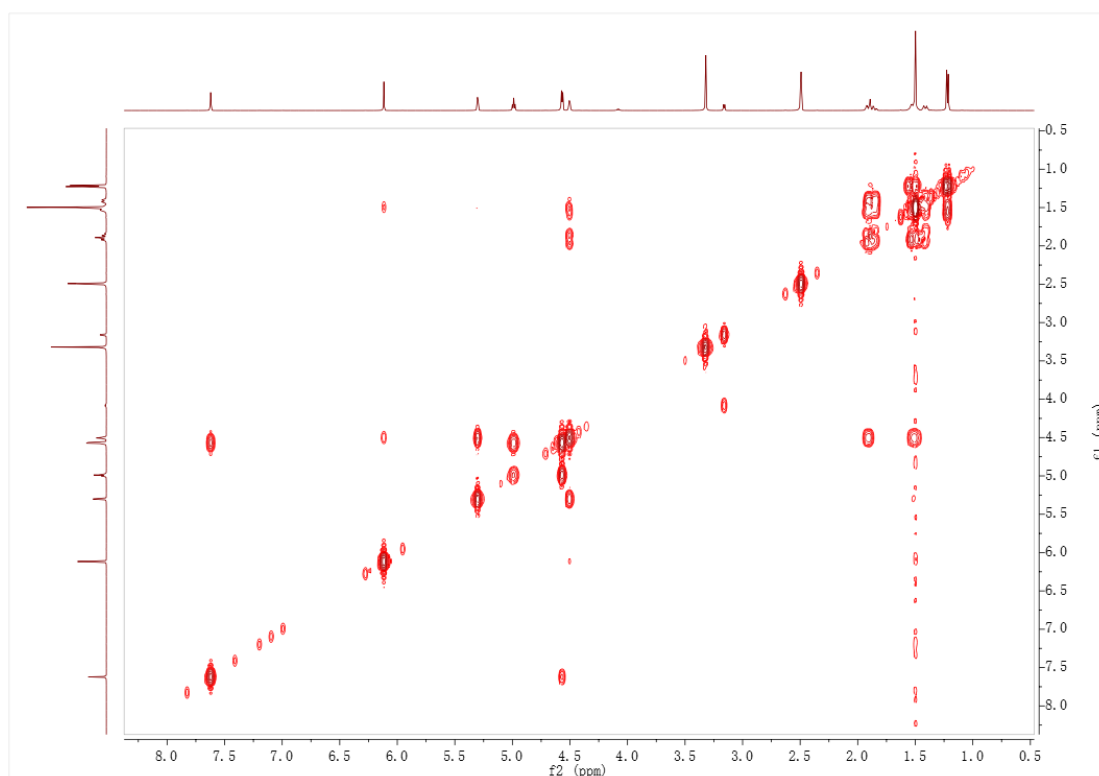

**Figure S5.**  $^1\text{H}$ - $^1\text{H}$  COSY (500 MHz, DMSO) spectrum of compound **1**.

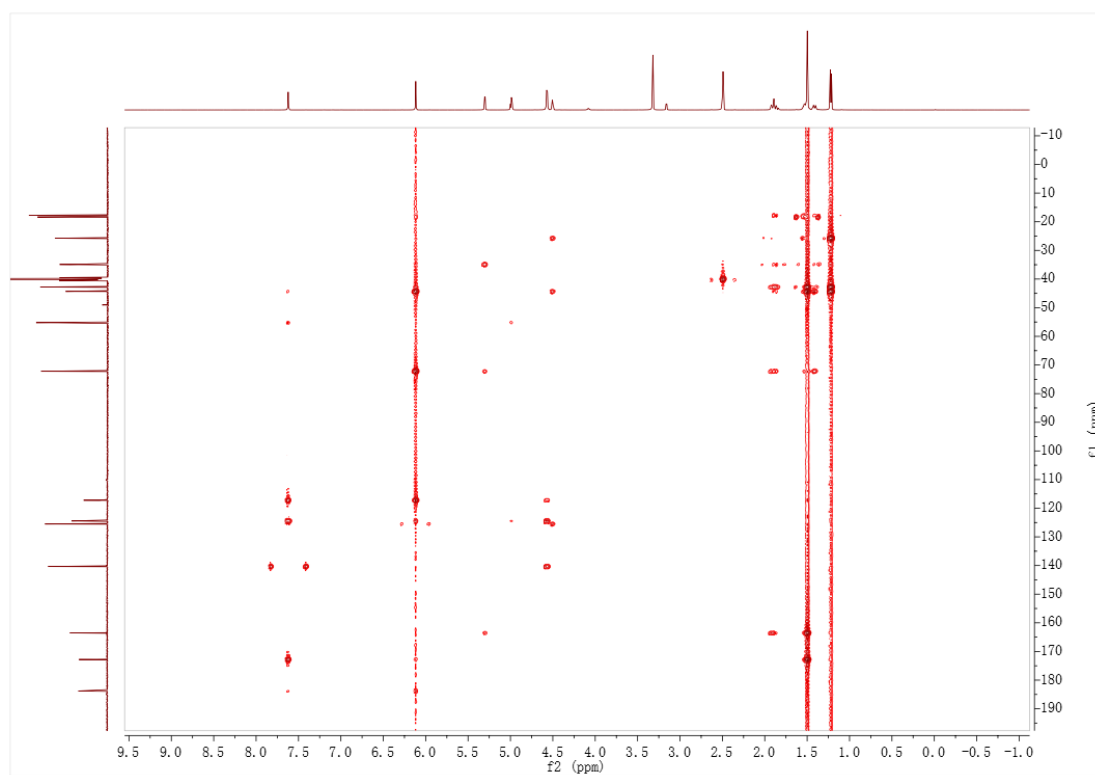

**Figure S6.** HMBC spectrum of compound **1**.

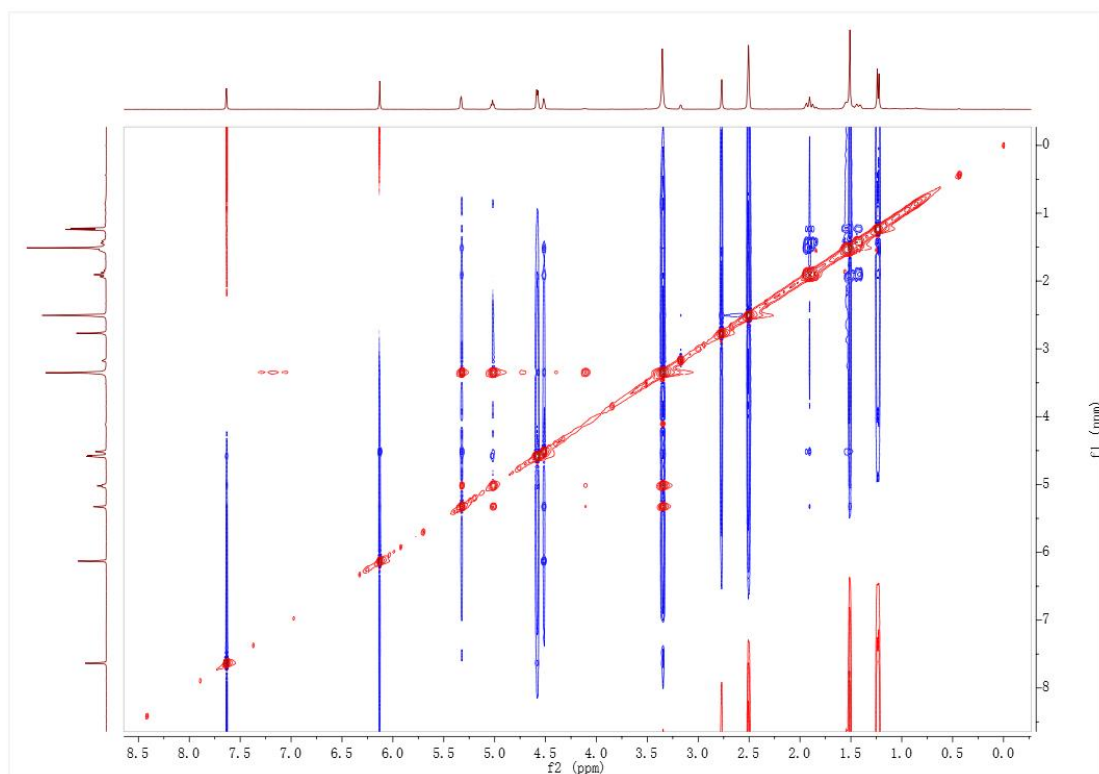

**Figure S7.** NOESY (400 MHz, DMSO) spectrum of compound **1**.

210707-NUM953 210707112634 #36-37 RT: 0.48-0.49 AV: 2 NL: 1.60E4  
FTMS - p ESI Full ms [150.00-1000.00]

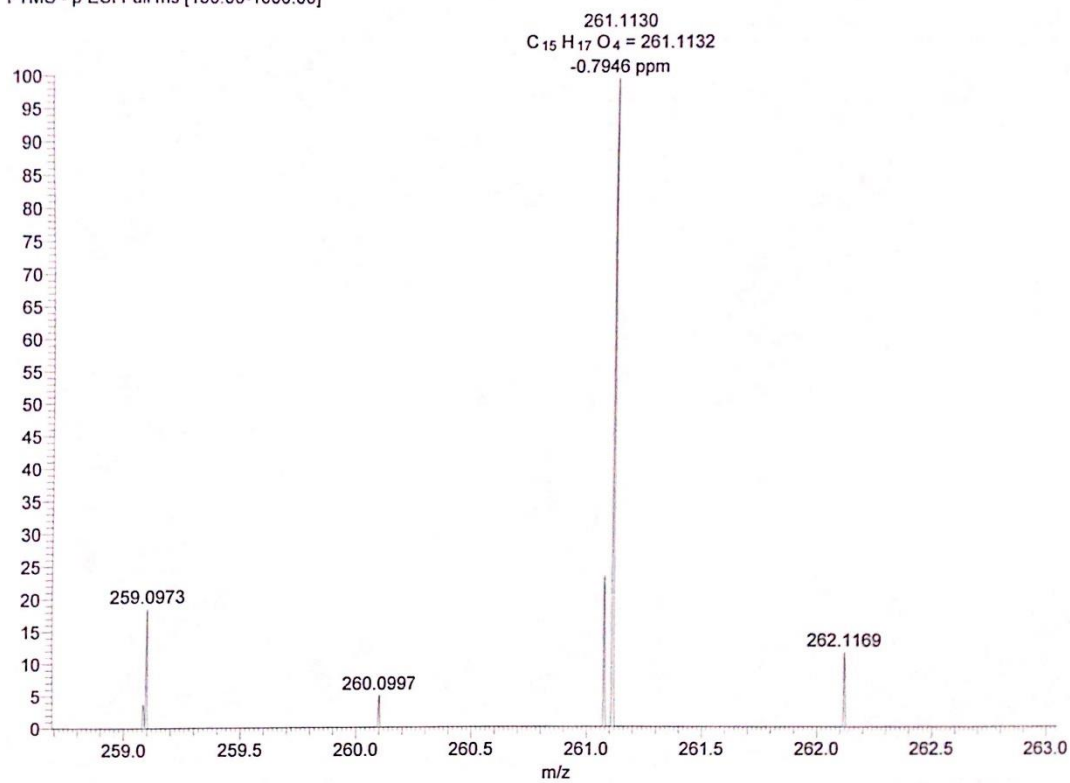

**Figure S8.** The HRESIMS spectrum of compound **1**.

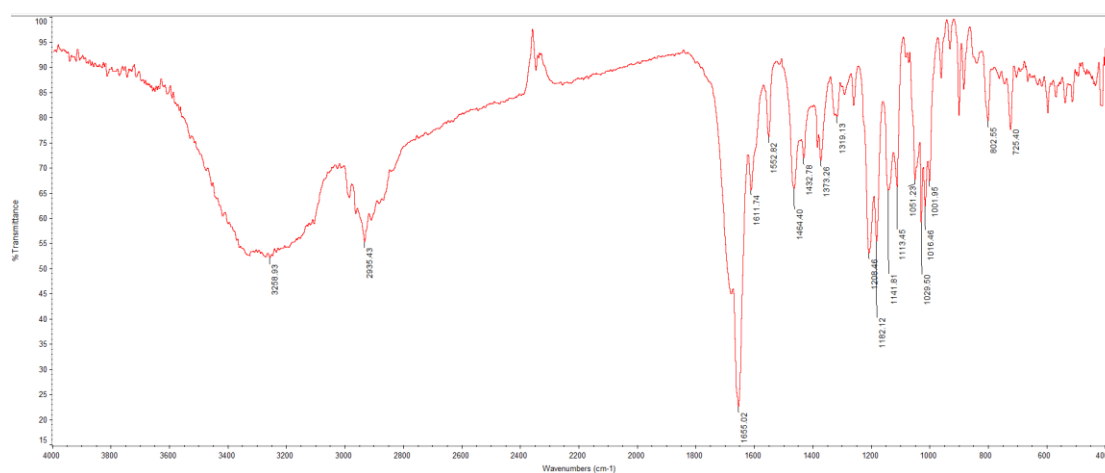

**Figure S9.** The IR spectrum of compound **1**.

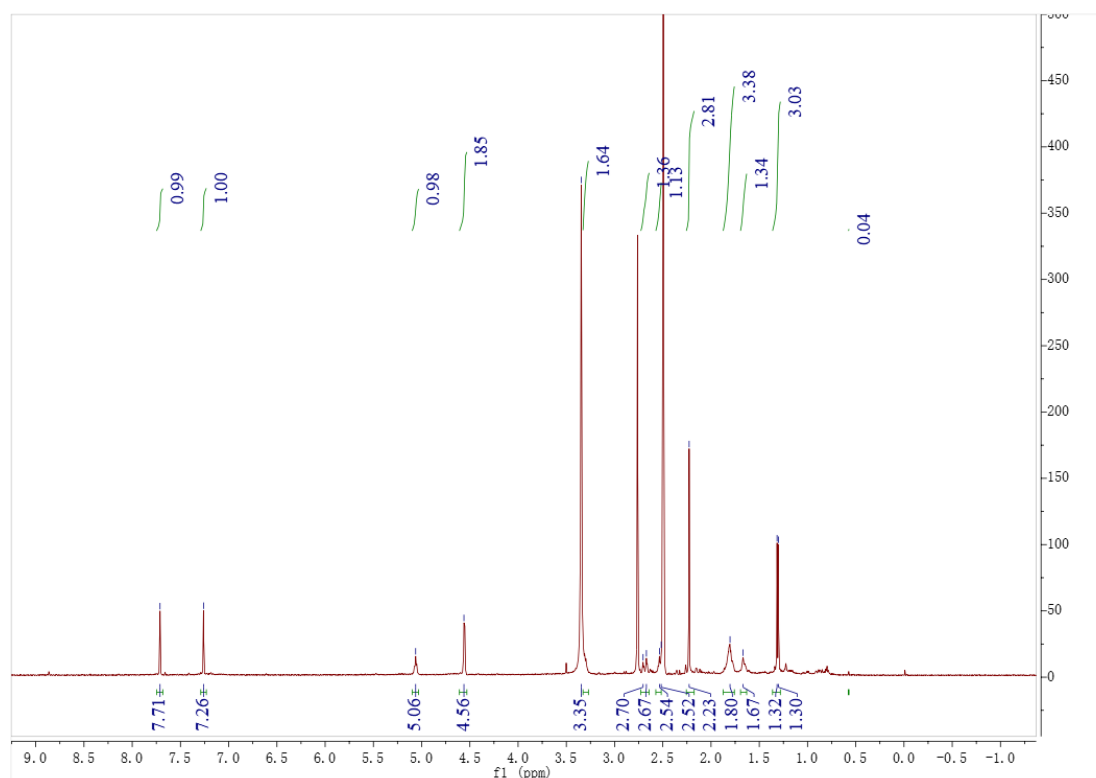

**Figure S10.** <sup>1</sup>H NMR (500 MHz, DMSO) spectrum of compound **2**.



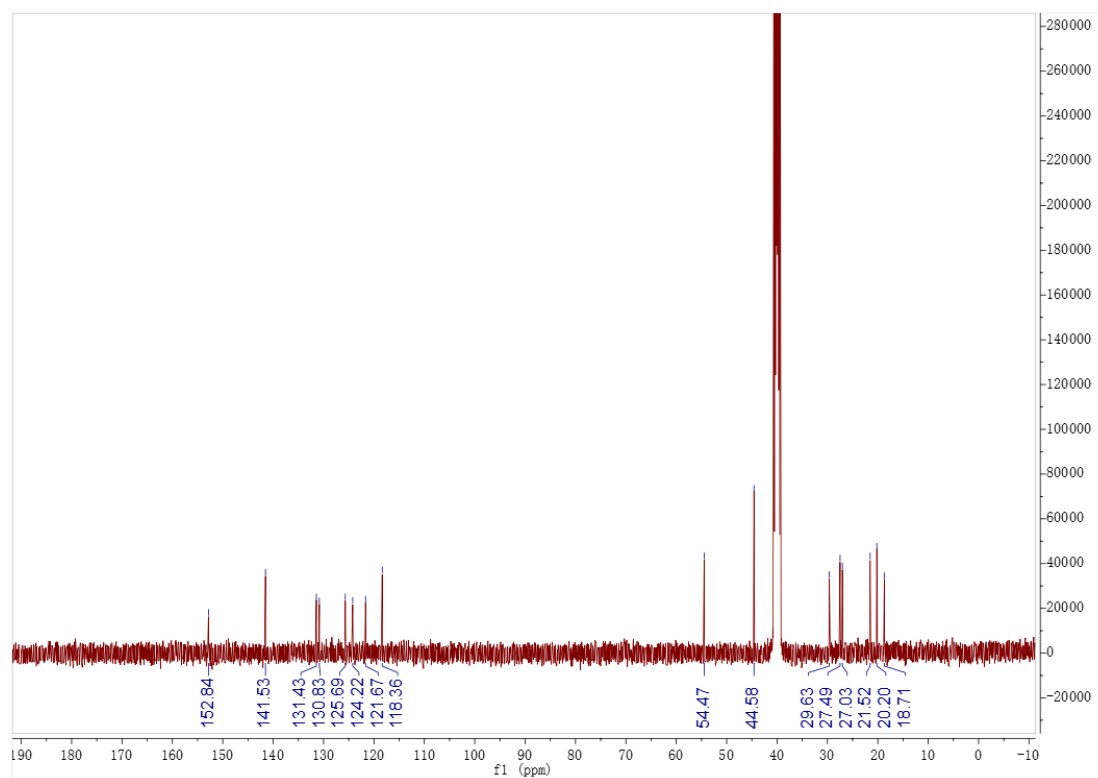

**Figure S11.** <sup>13</sup>C NMR (100 MHz, DMSO) spectrum of compound 2.

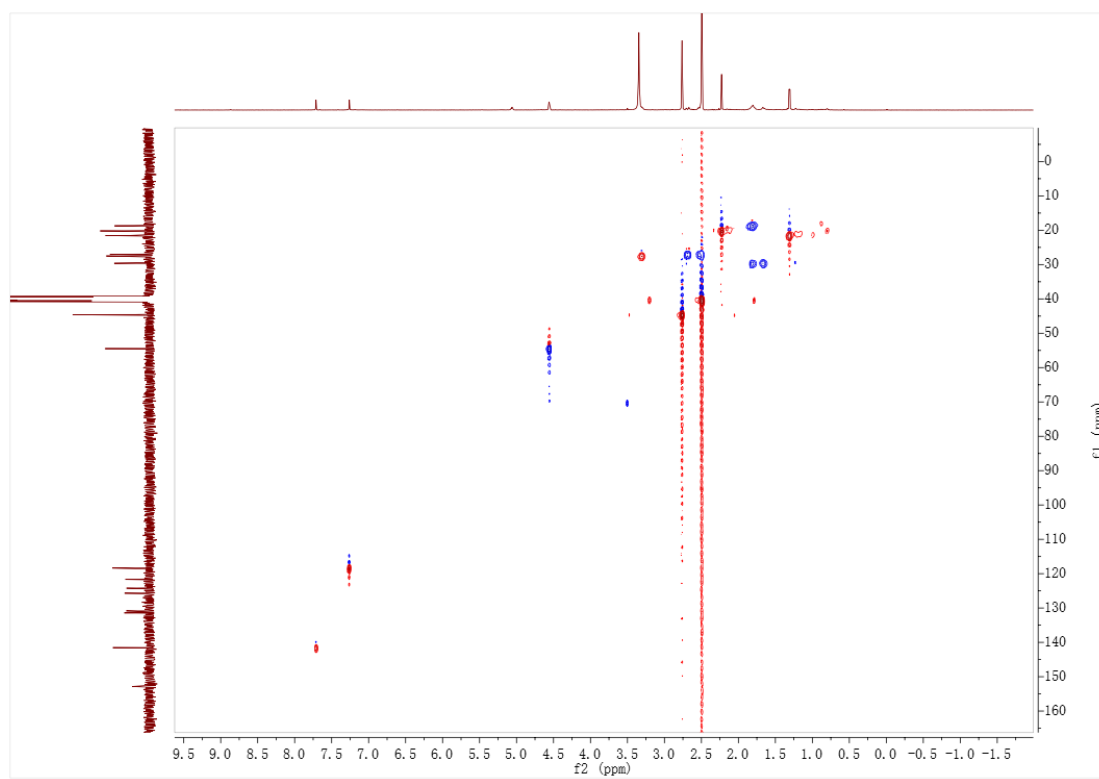

**Figure S12.** HSQC spectrum of compound 2.

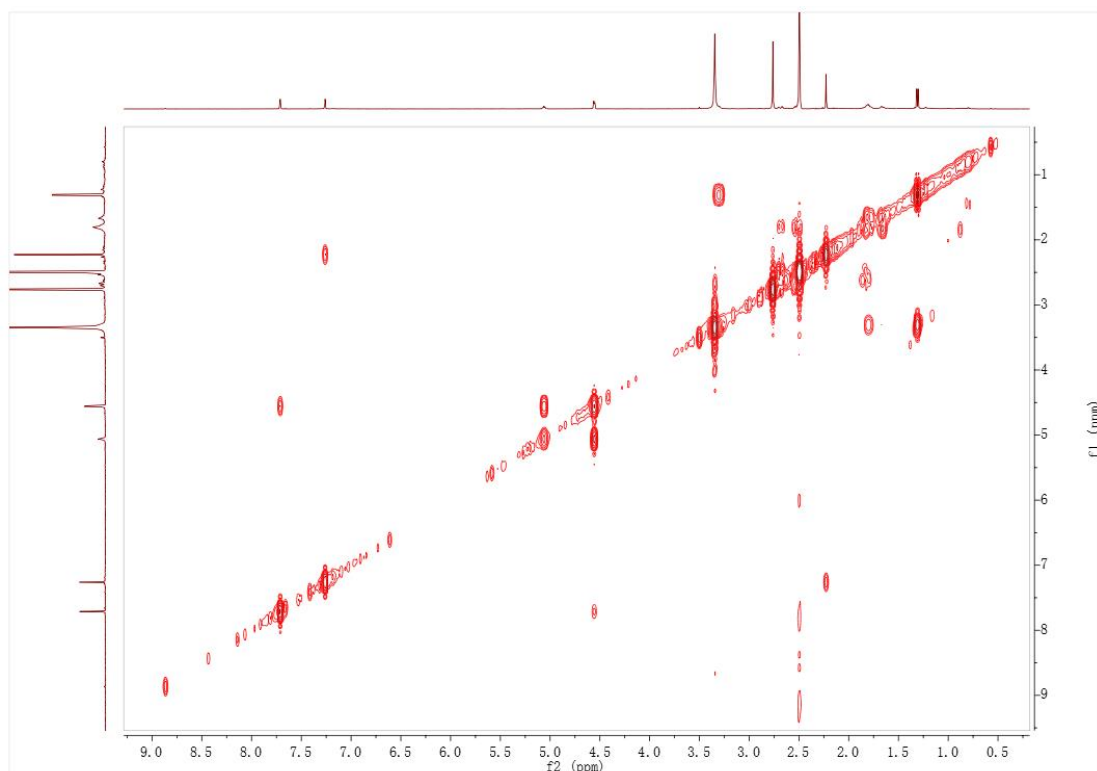

**Figure S13.**  $^1\text{H}$ - $^1\text{H}$  COSY (500 MHz, DMSO) spectrum of compound **2**.

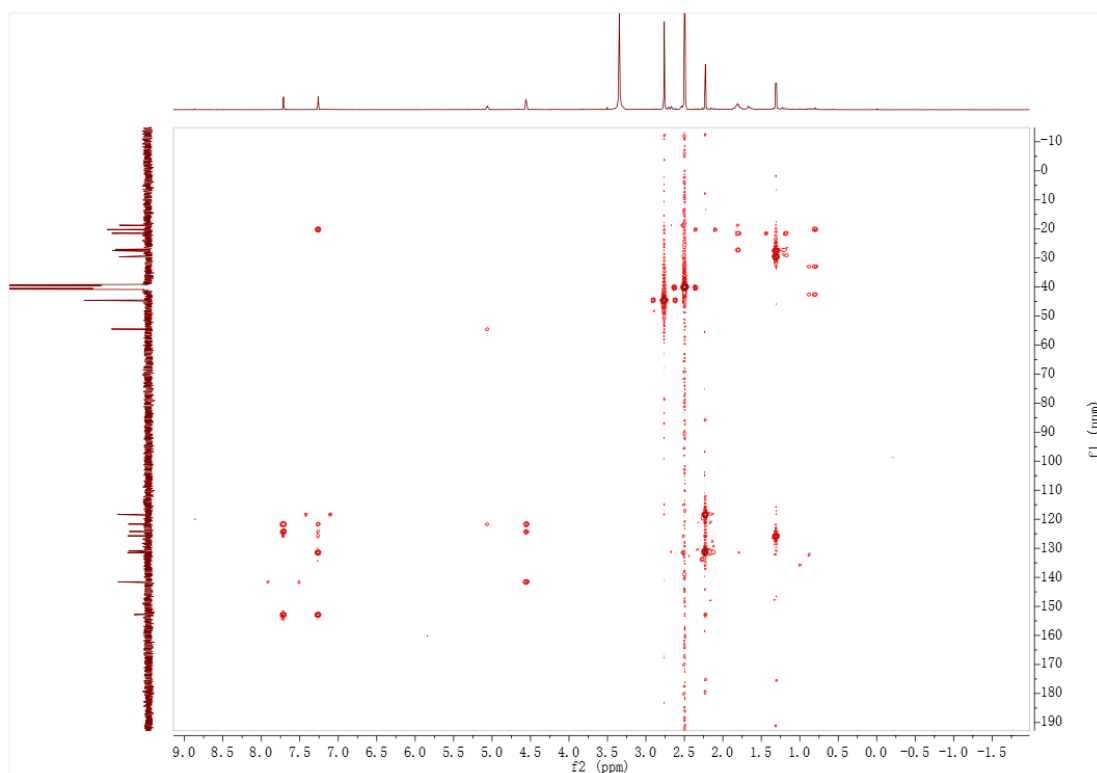

**Figure S14.** HMBC spectrum of compound **2**.

Mass spectrum of compound 10. The x-axis represents the mass-to-charge ratio ( $m/z$ ) and the y-axis represents the relative intensity (0 to 100). The base peak is at  $m/z$  231.1017. Other labeled peaks include  $m/z$  224.9979, 226.9650, 229.1227, 230.8806, and 232.9136. The chemical formula  $C_{15}H_{17}O_2$  and a value of 229.1234 are also indicated.

| $m/z$    | Relative Intensity (%) |
|----------|------------------------|
| 224.9979 | ~90                    |
| 226.9650 | ~95                    |
| 229.1227 | ~75                    |
| 230.8806 | ~55                    |
| 231.1017 | 100                    |
| 232.9136 | ~70                    |

Wavenumbers (cm<sup>-1</sup>)

% Transmittance

4000 3000 2000 1800 1600 1400 1200 1000 800 600 400

3053.44  
3013.37  
3097.37  
3049.07  
3028.42  
3567.07  
3545.63  
3425.92  
2927.60  
1716.16  
1662.61  
1653.80  
1646.43  
1632.84  
1623.72  
1616.54  
1609.59  
1576.40  
1569.26  
1559.17  
1540.10  
1506.62  
1499.43  
1472.61  
1465.14  
1447.37  
1436.92  
1436.41  
1418.35  
1385.72  
1299.86  
1141.05  
446.07

**Figure S16.** The IR spectrum of compound **2**.

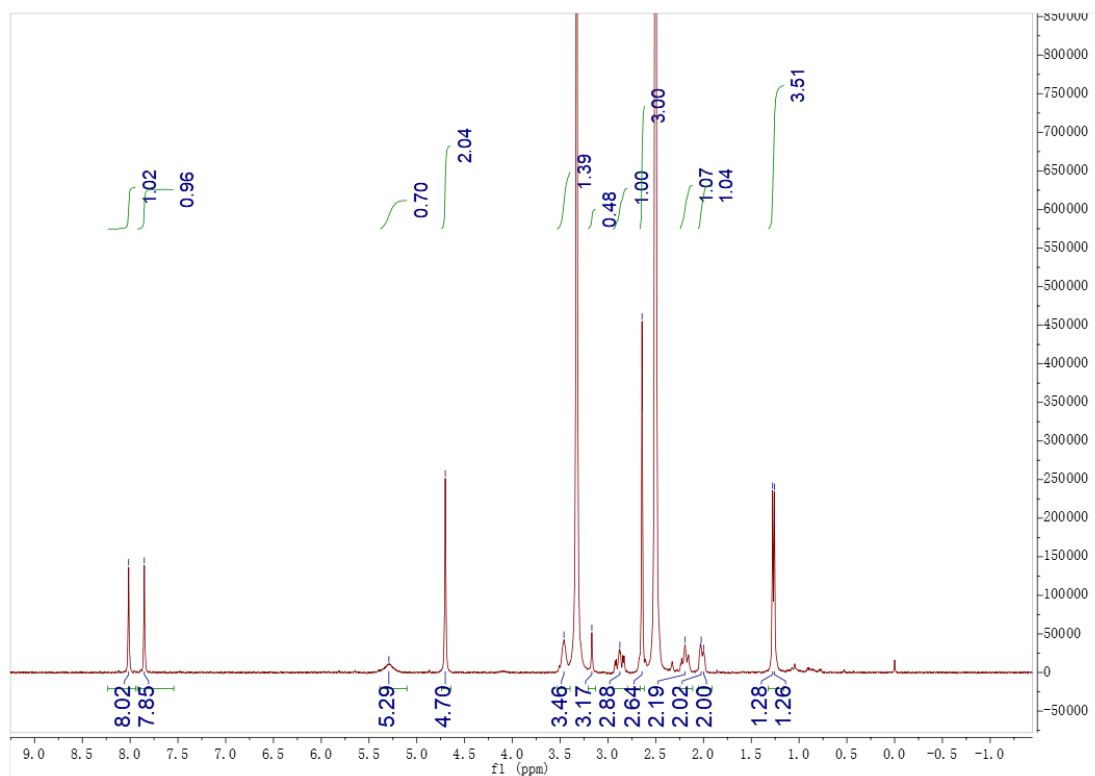

**Figure S17.** <sup>1</sup>H NMR (400 MHz, DMSO) spectrum of compound **3**.

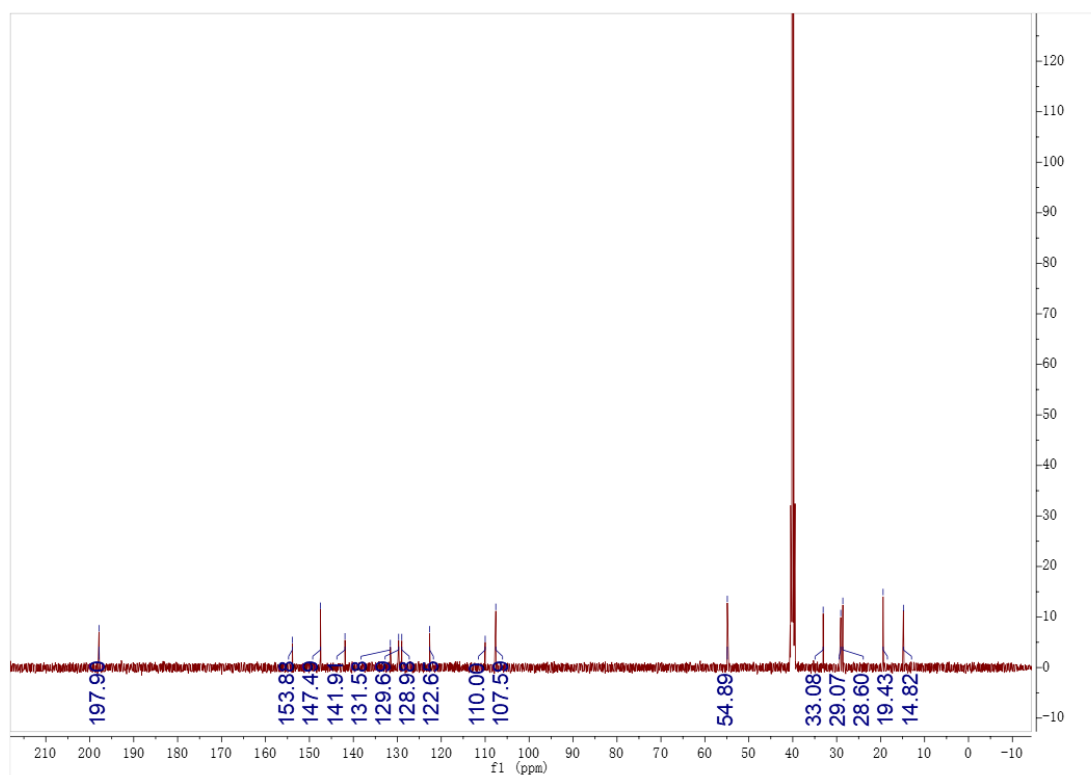

**Figure S18.** <sup>13</sup>C NMR (125 MHz, DMSO) spectrum of compound **3**.

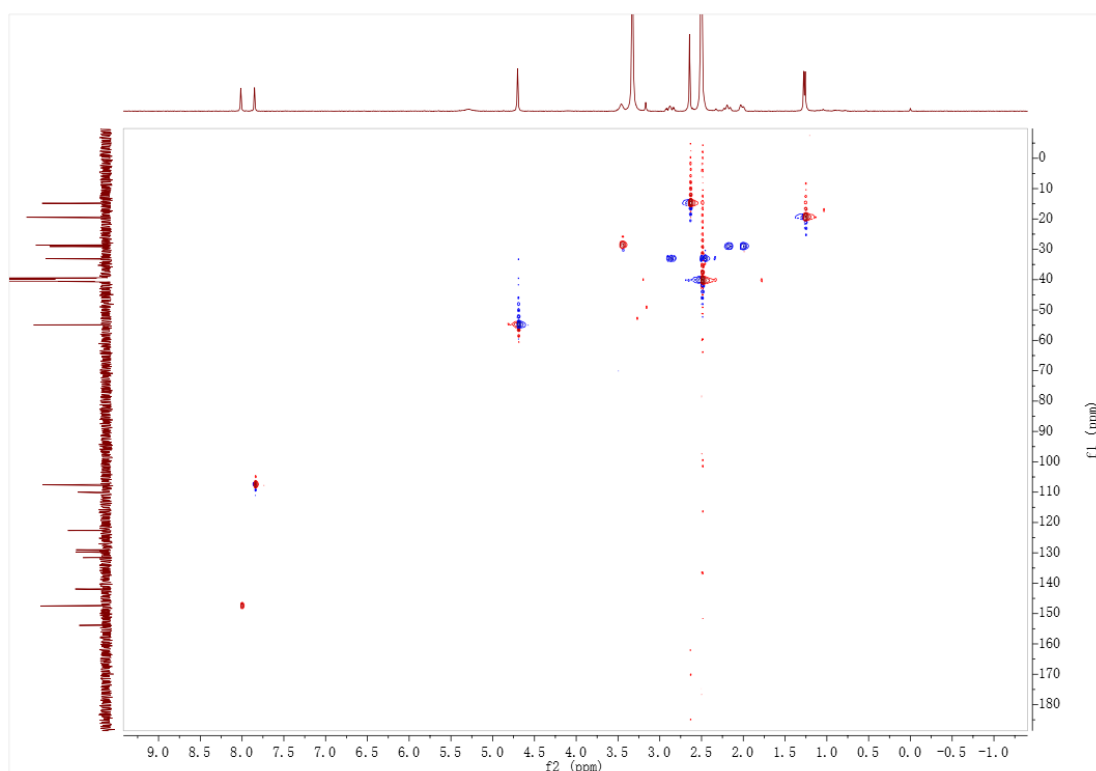

**Figure S19.** HSQC spectrum of compound **3**.

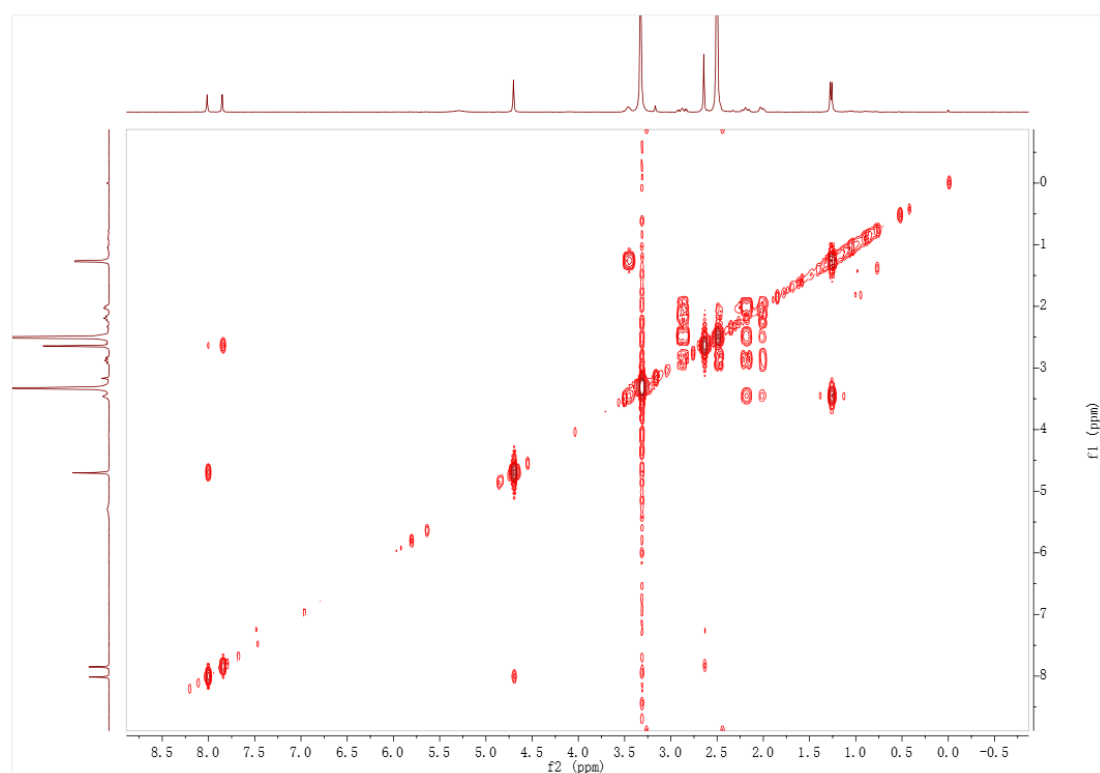

**Figure S20.**  $^1\text{H}$ - $^1\text{H}$  COSY (500 MHz, DMSO) spectrum of compound **3**.

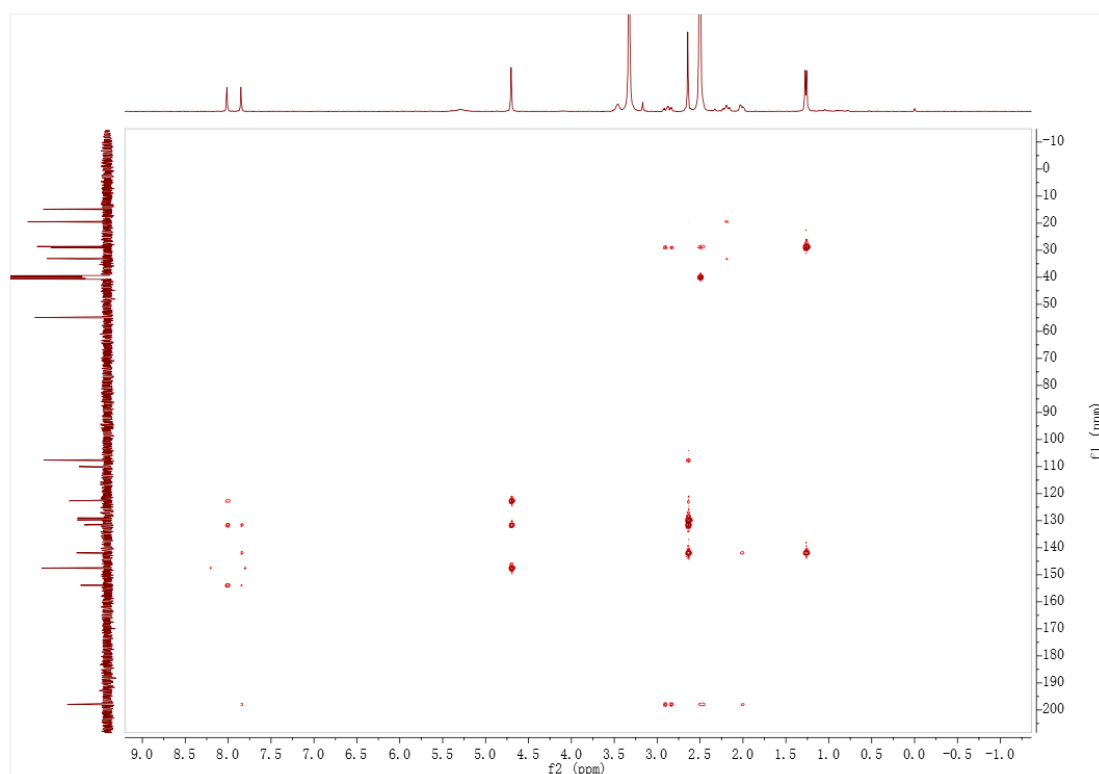

**Figure S21.** HMBC spectrum of compound **3**.

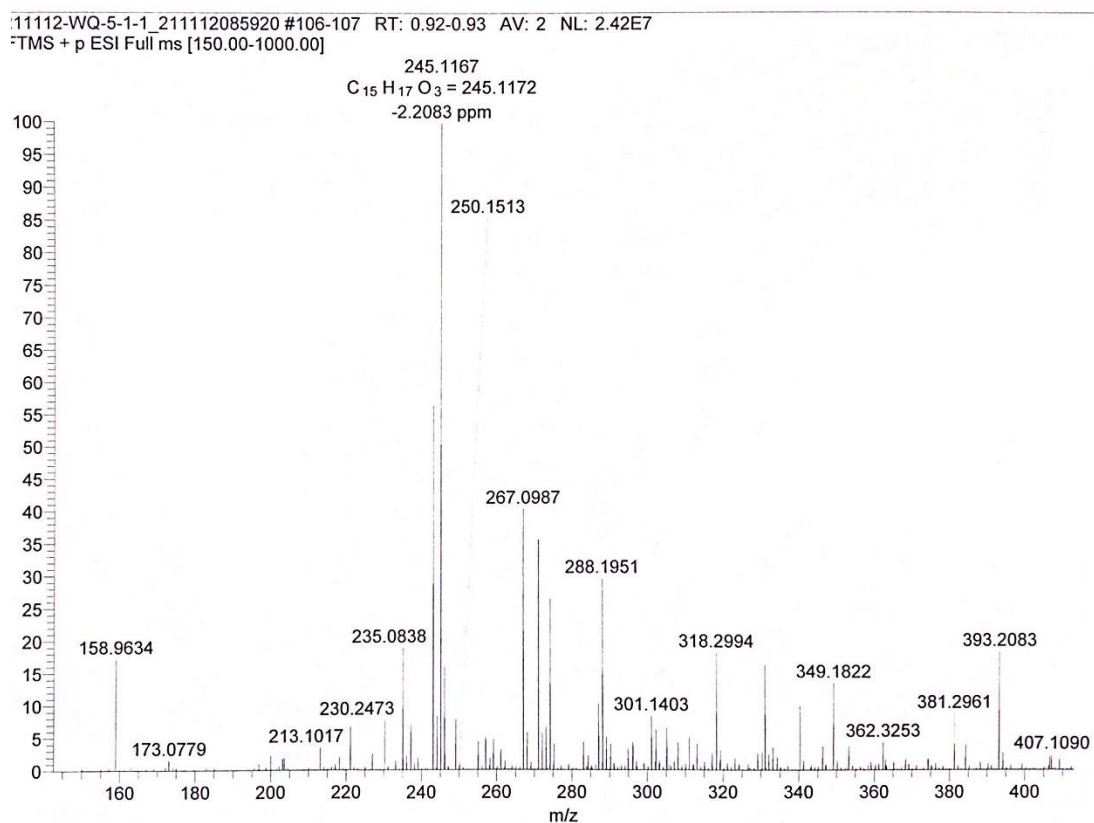

**Figure S22.** The HRESIMS spectrum of compound **3**.

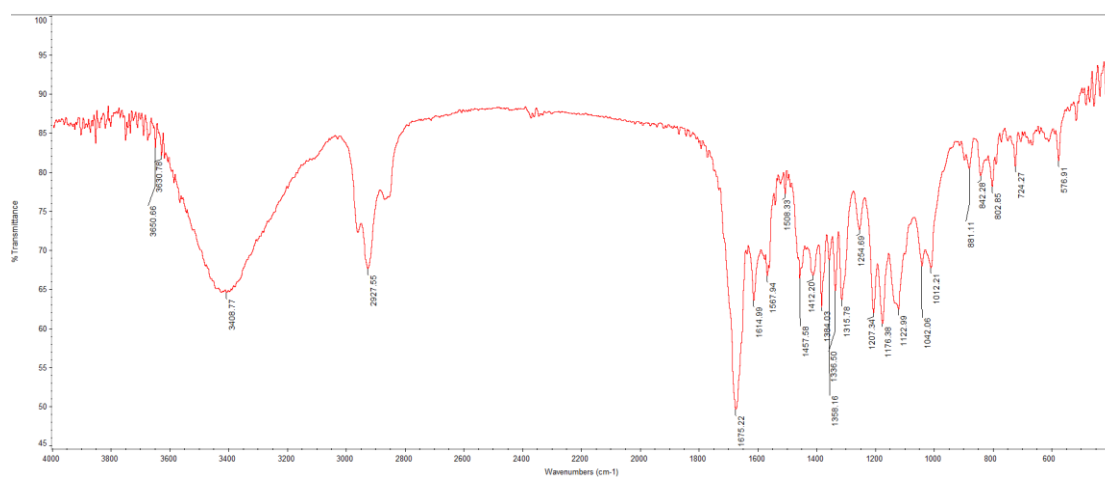

**Figure S23.** The IR spectrum of compound **3**.

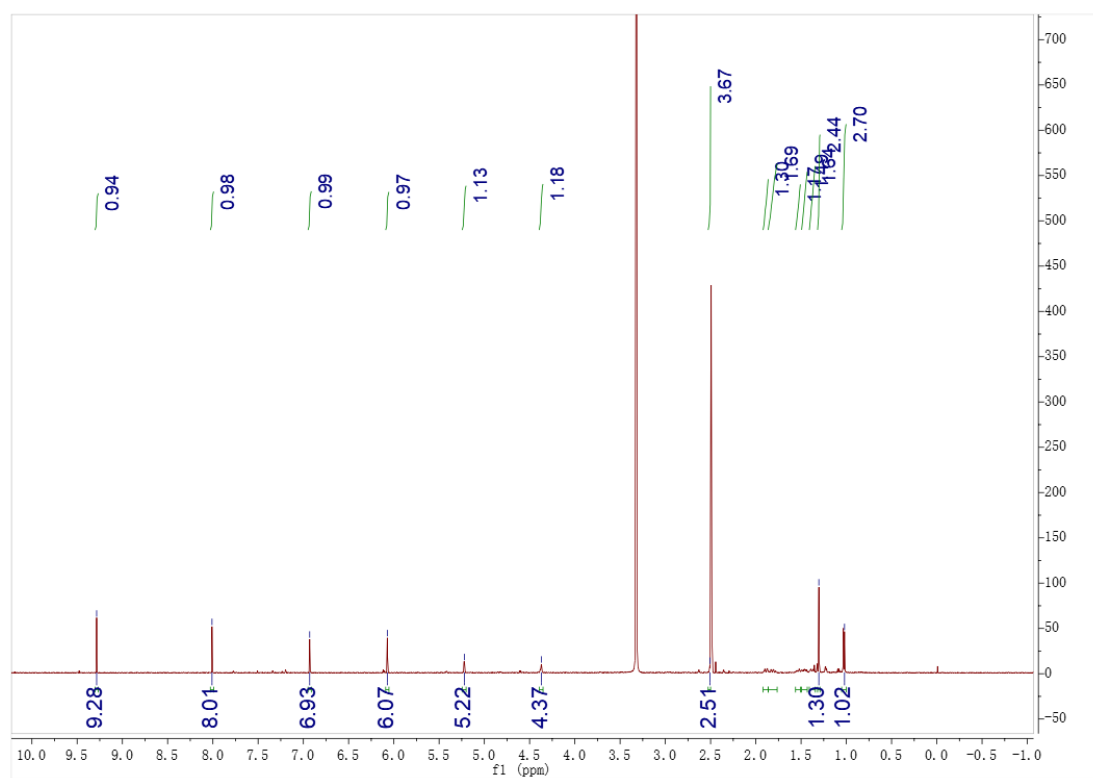

**Figure S24.**  $^1\text{H}$  NMR (500 MHz, DMSO) spectrum of compound **4**.

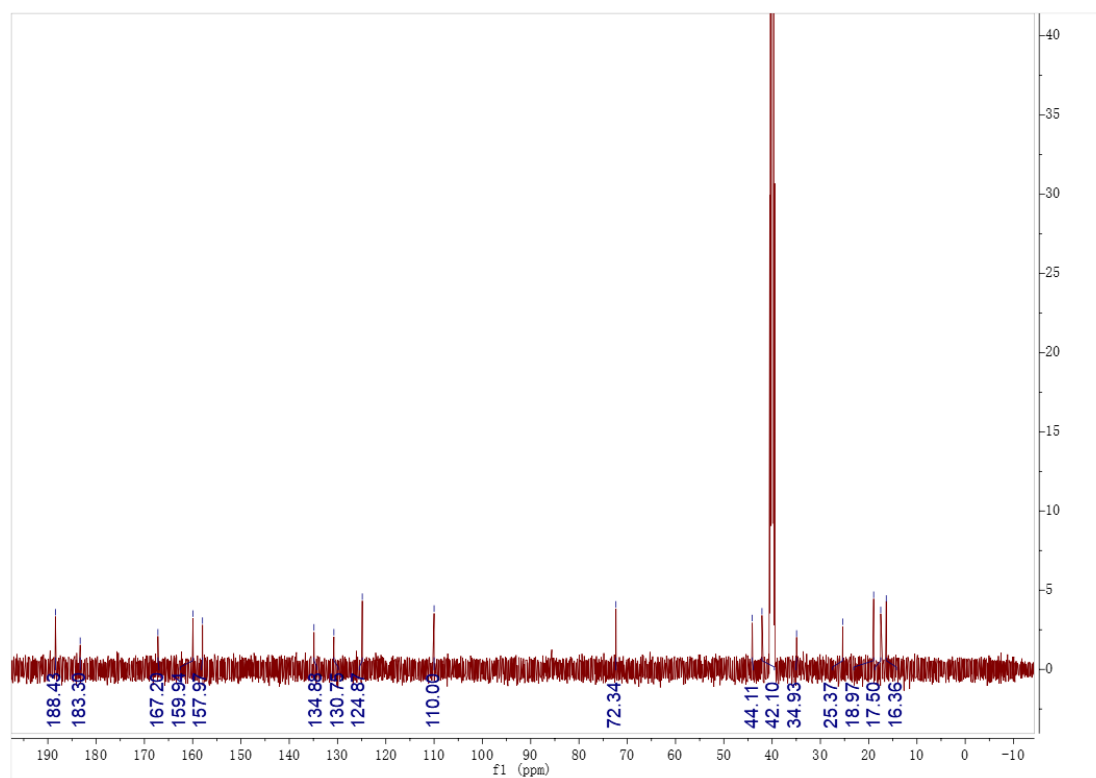

**Figure S25.** <sup>13</sup>C NMR (125 MHz, DMSO) spectrum of compound **4**.

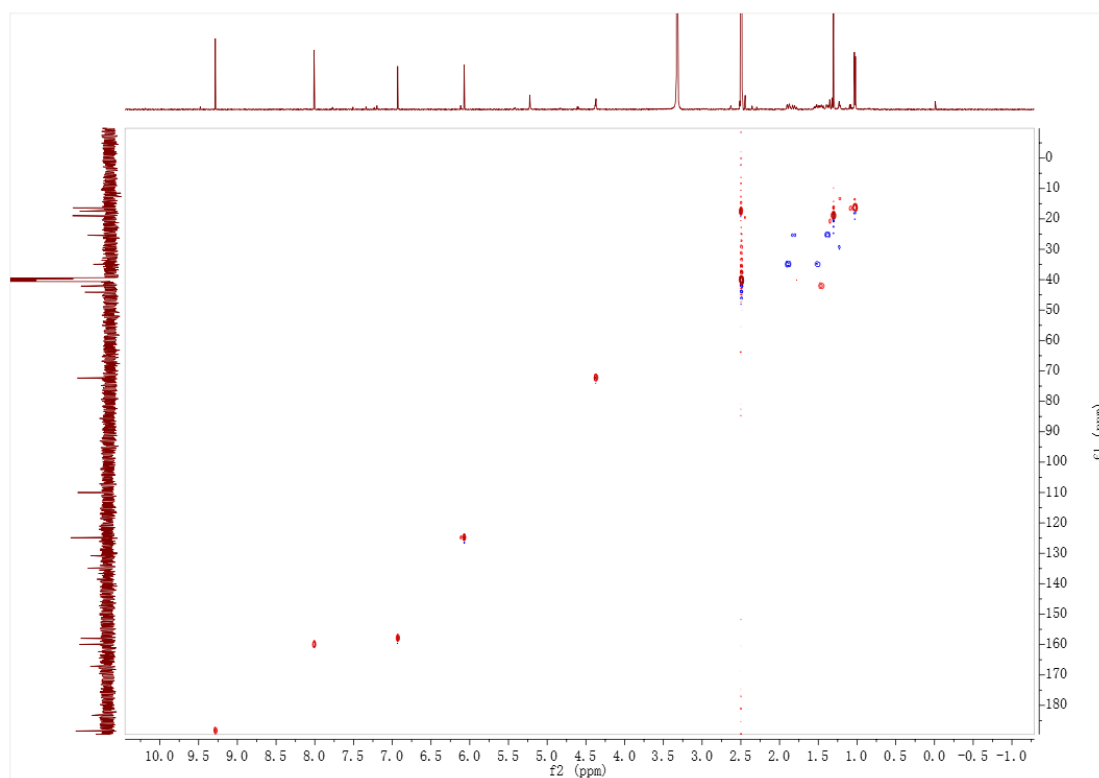

**Figure S26.** HSQC spectrum of compound **4**.



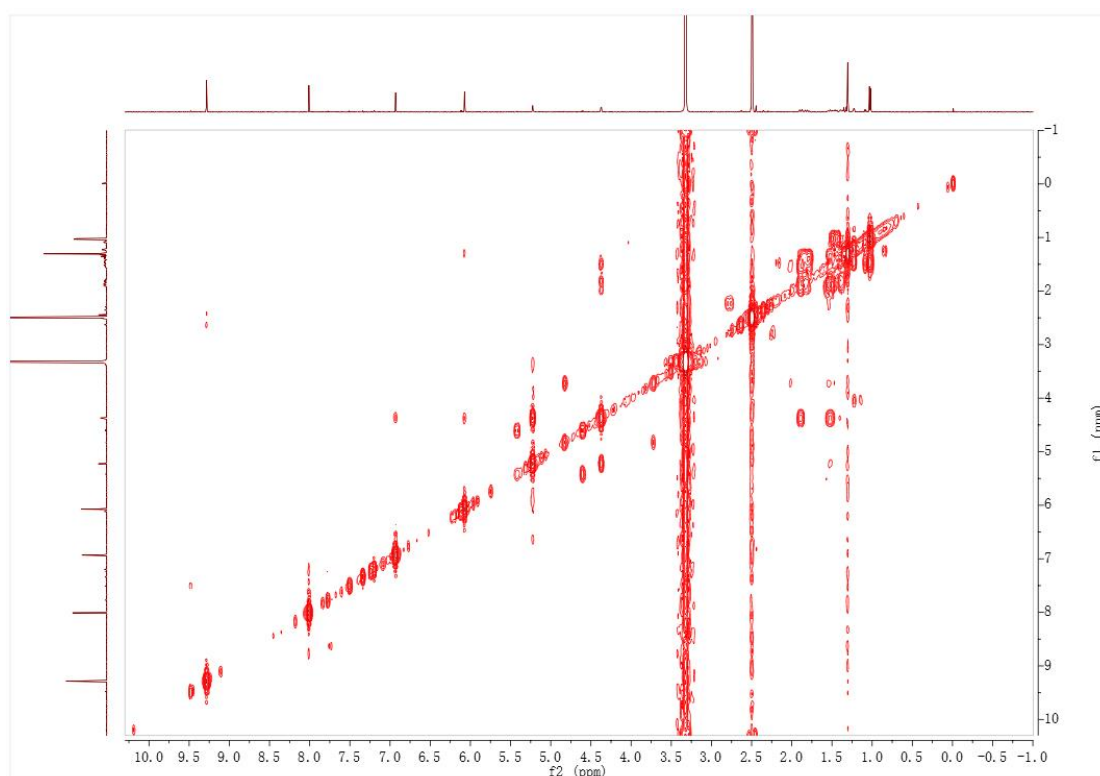

**Figure S27.**  $^1\text{H}$ - $^1\text{H}$  COSY (500 MHz, DMSO) spectrum of compound **4**.

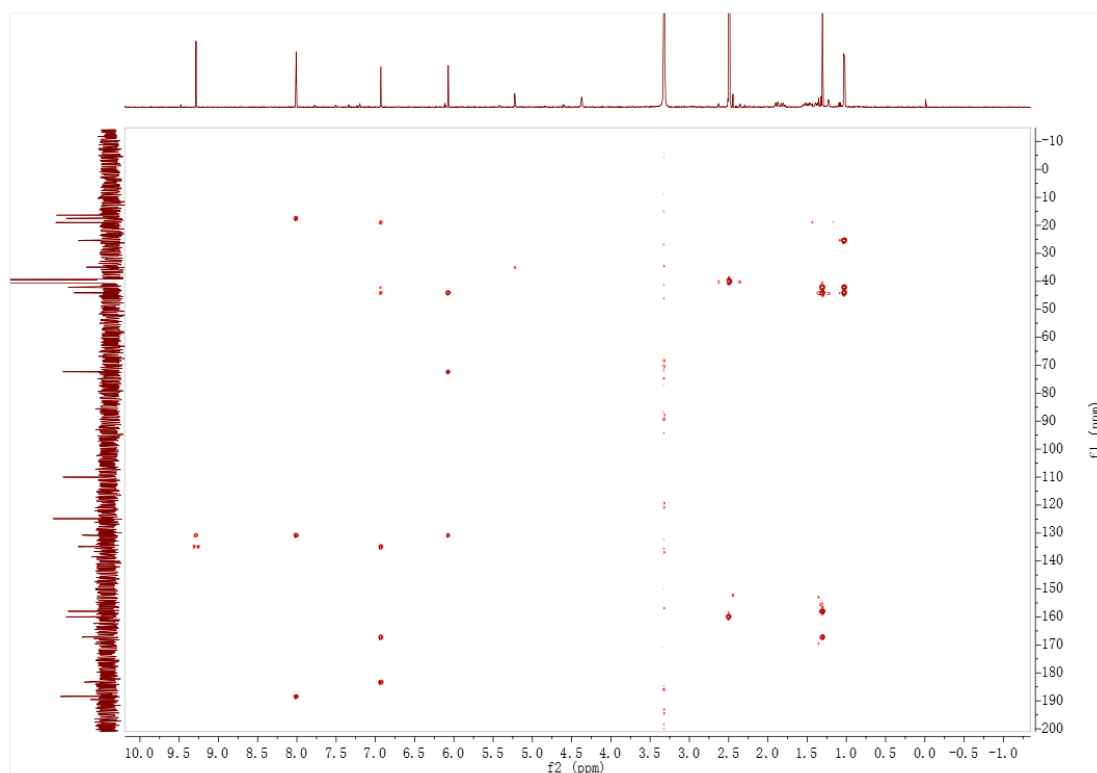

**Figure S28.** HMBC spectrum of compound **4**.

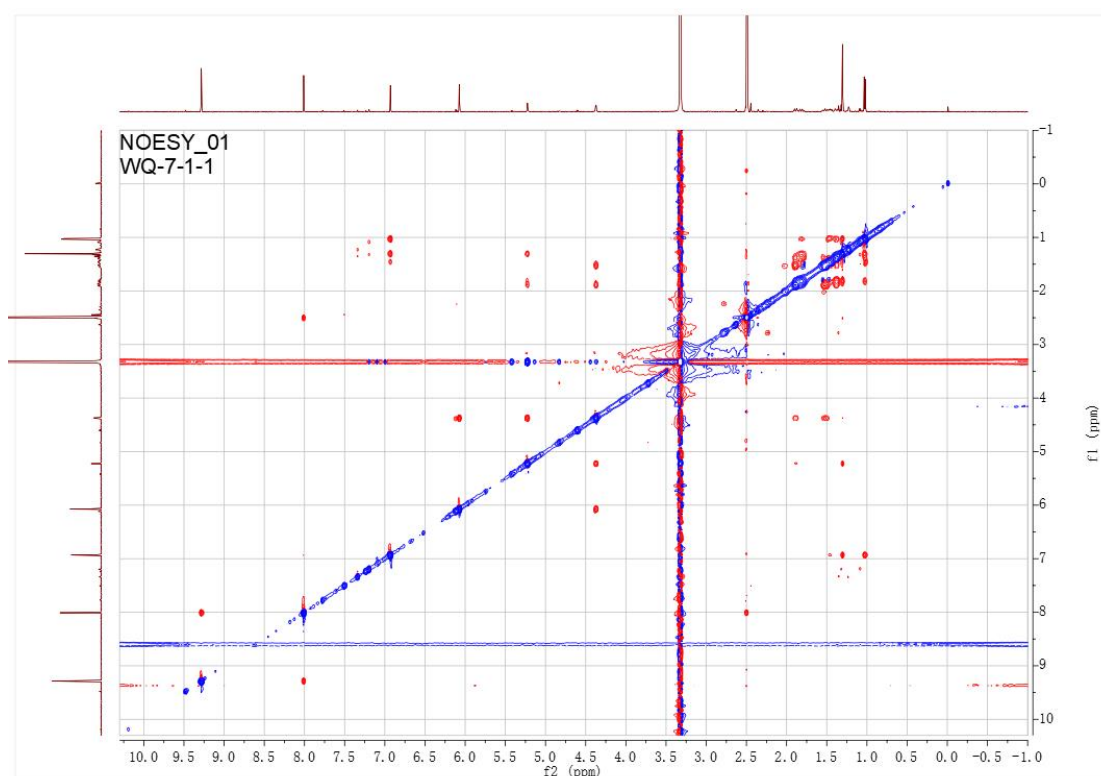

**Figure S29.** NOESY (500 MHz, DMSO) spectrum of compound **4**.

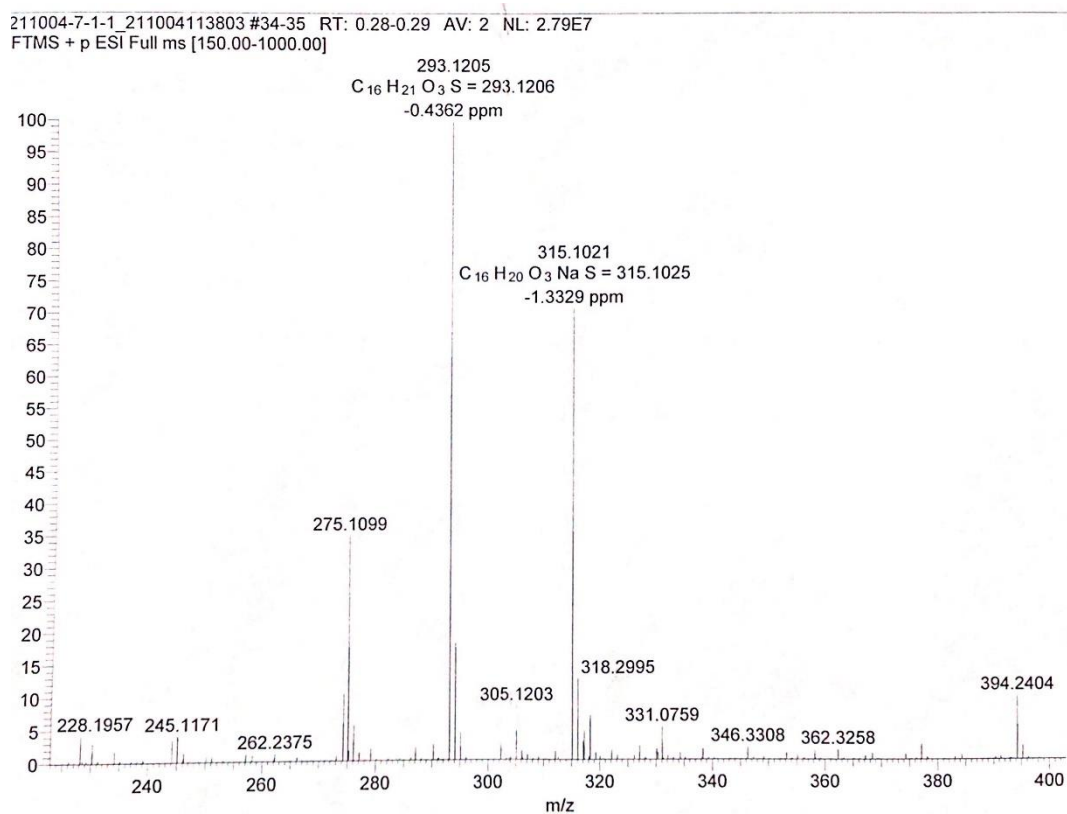

**Figure S30.** The HRESIMS spectrum of compound **4**.

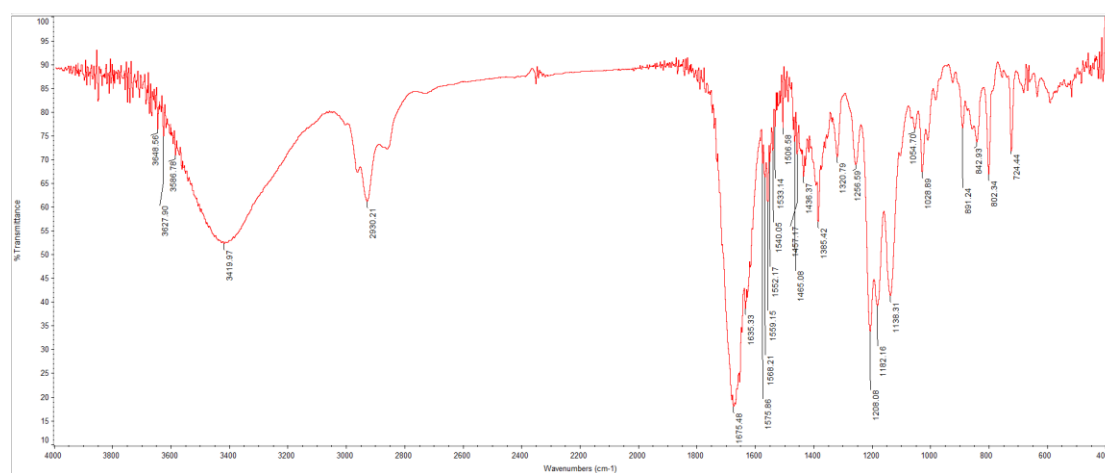

**Figure S31.** The IR spectrum of compound **4**.

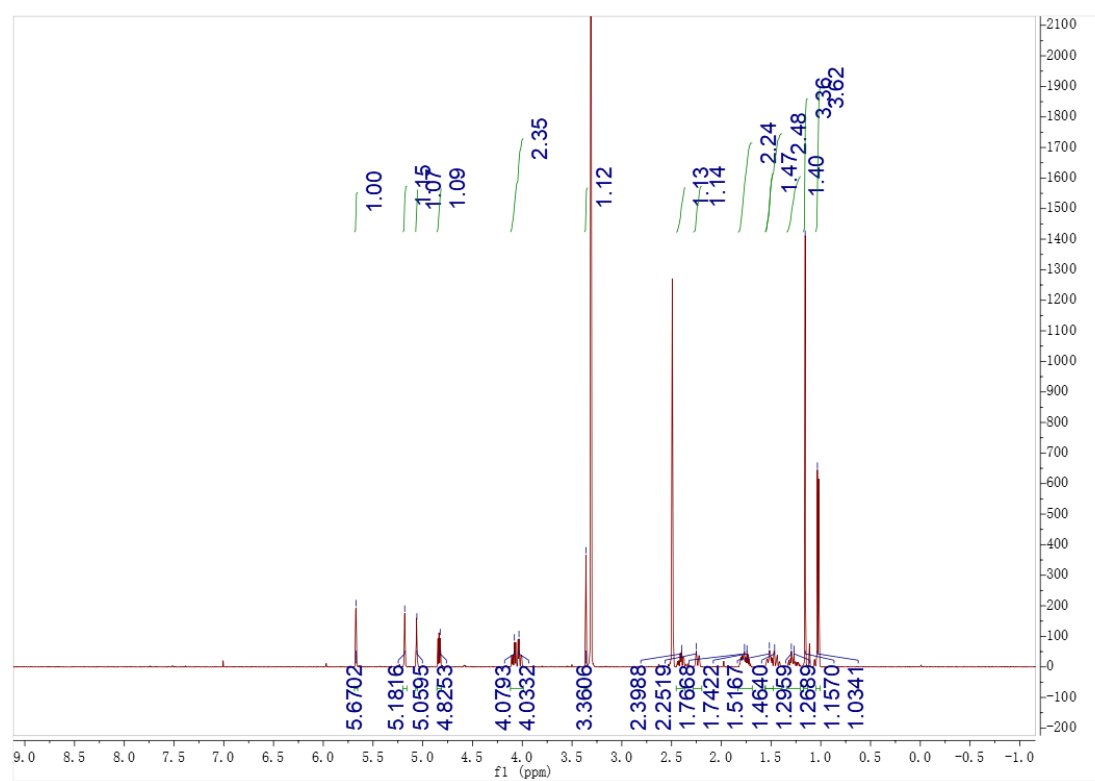

**Figure S32.**  $^1\text{H}$  NMR (500 MHz, DMSO) spectrum of compound **5**.

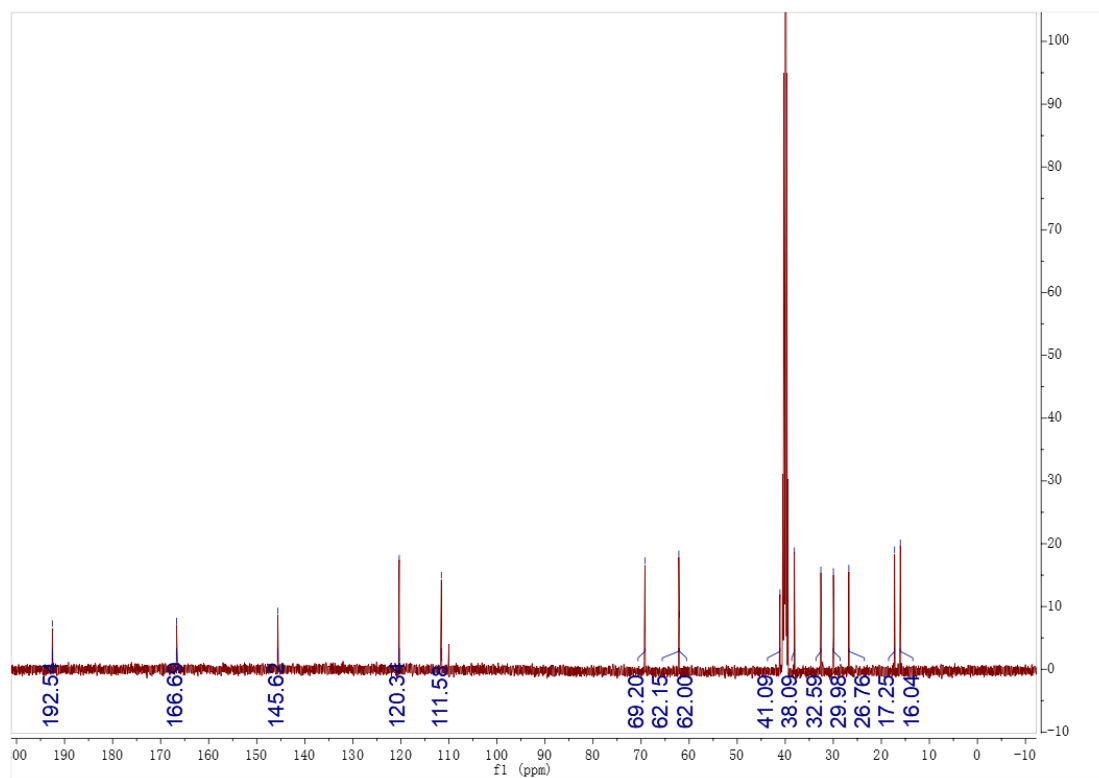

**Figure S33.** <sup>13</sup>C NMR (125 MHz, DMSO) spectrum of compound **5**.

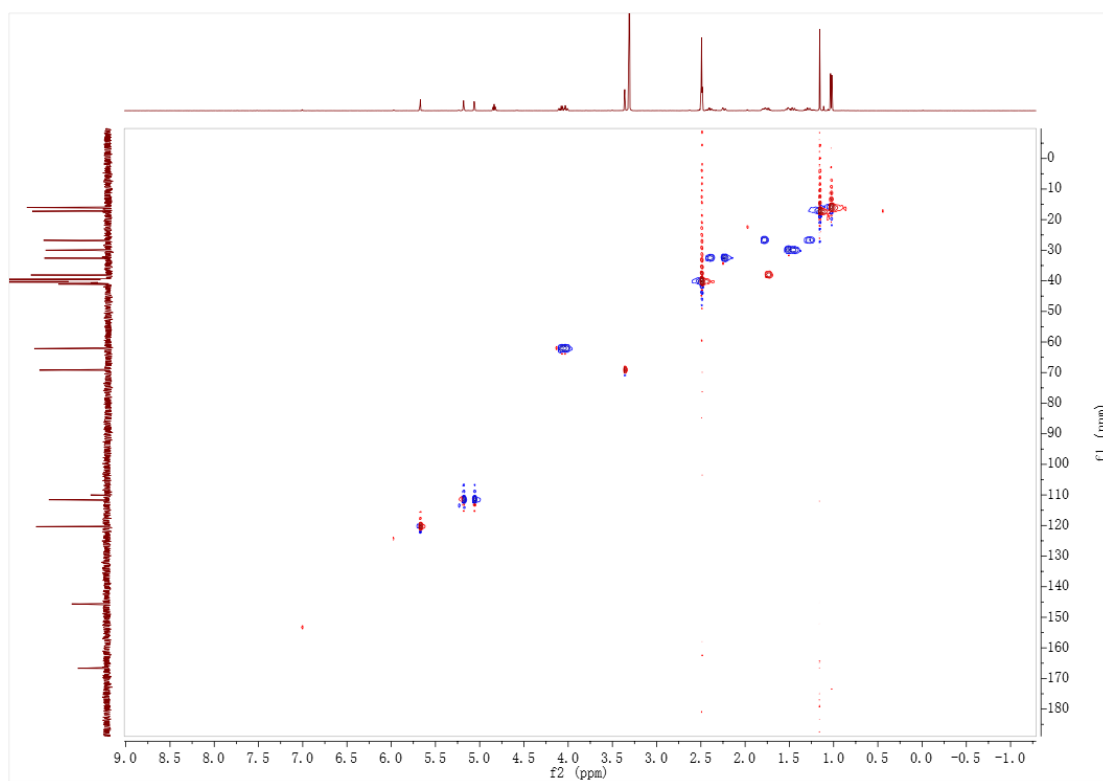

**Figure S34.** HSQC spectrum of compound **5**.

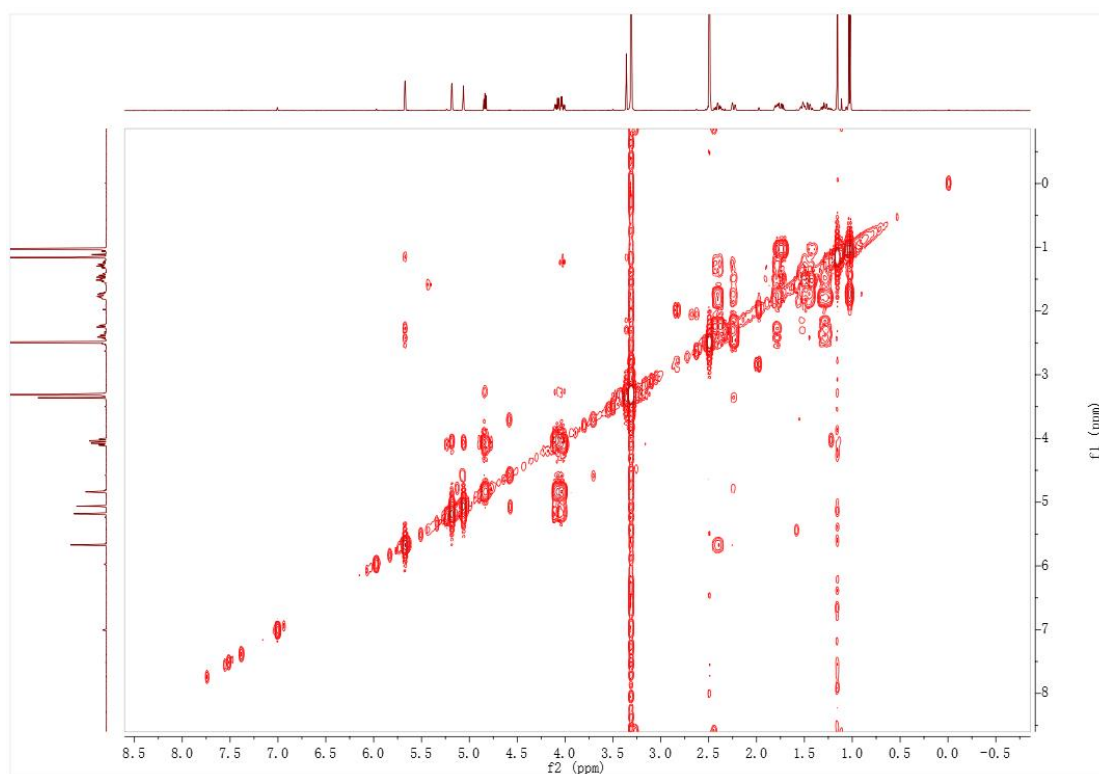

**Figure S35.**  $^1\text{H}$ - $^1\text{H}$  COSY (500 MHz, DMSO) spectrum of compound **5**.

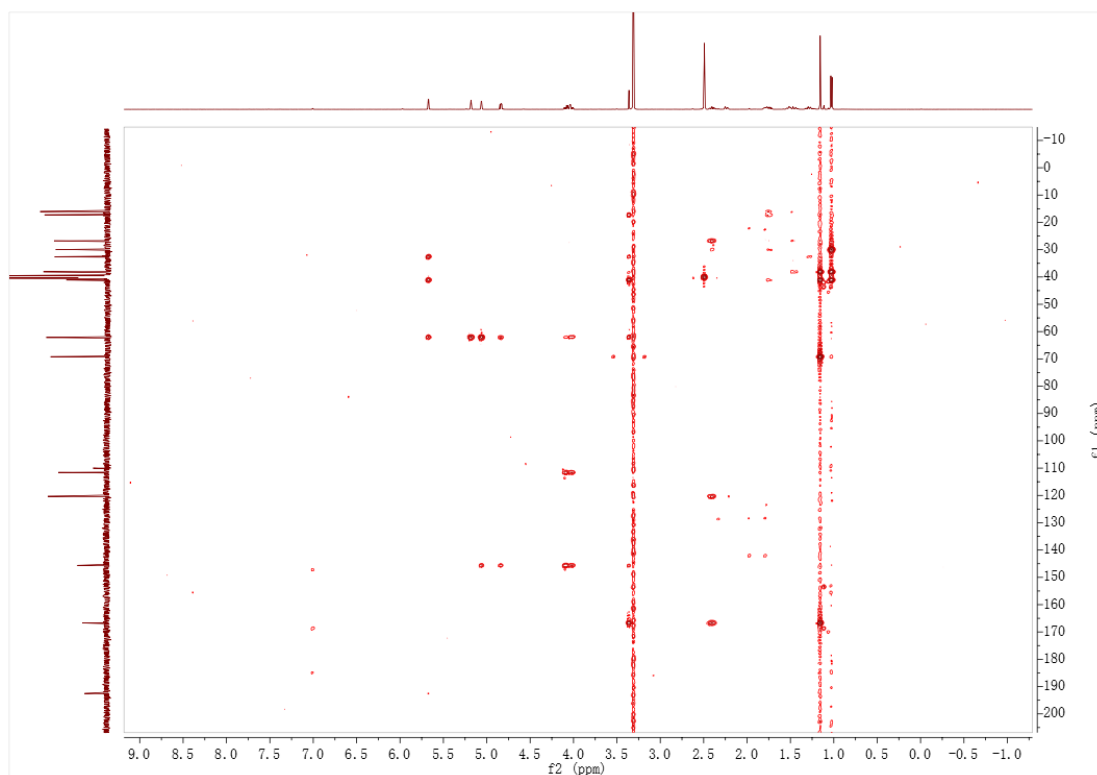

**Figure S36.** HMBC spectrum of compound **5**.

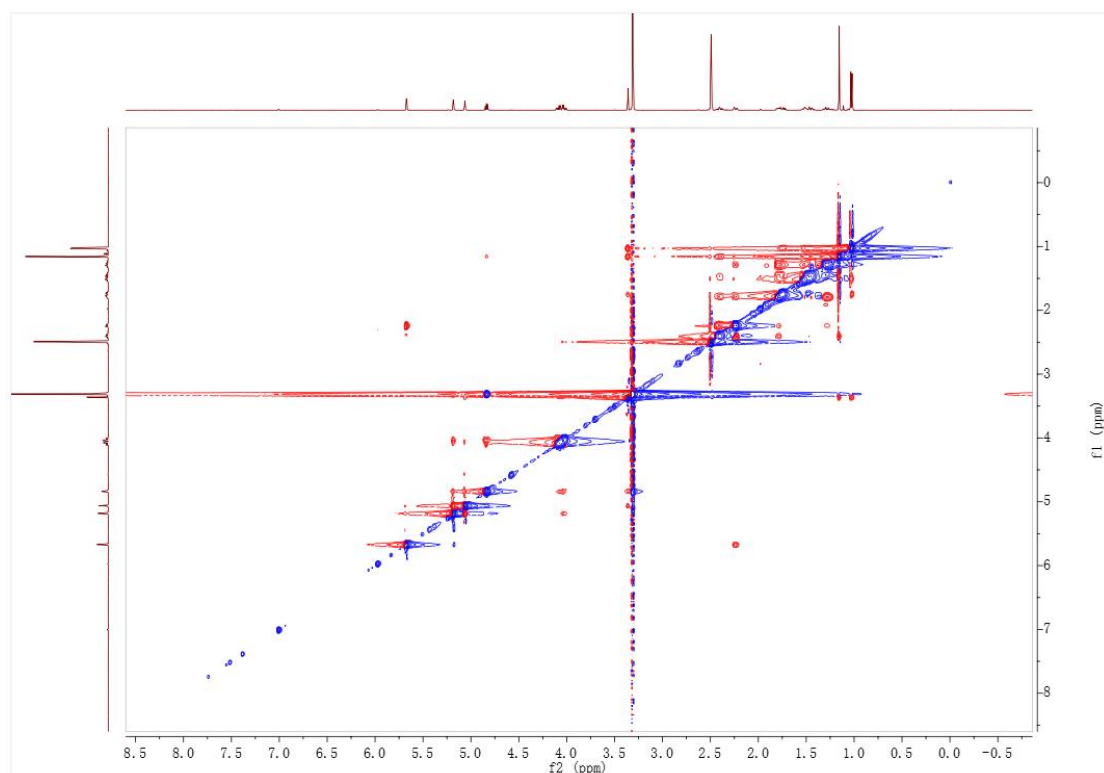

**Figure S37.** NOESY (500 MHz, DMSO) spectrum of compound **5**.

211112-WQ-5-1-2\_211112084204 #21-22 RT: 0.17-0.18 AV: 2 NL: 2.60E8  
FTMS + p ESI Full ms [150.00-1000.00]

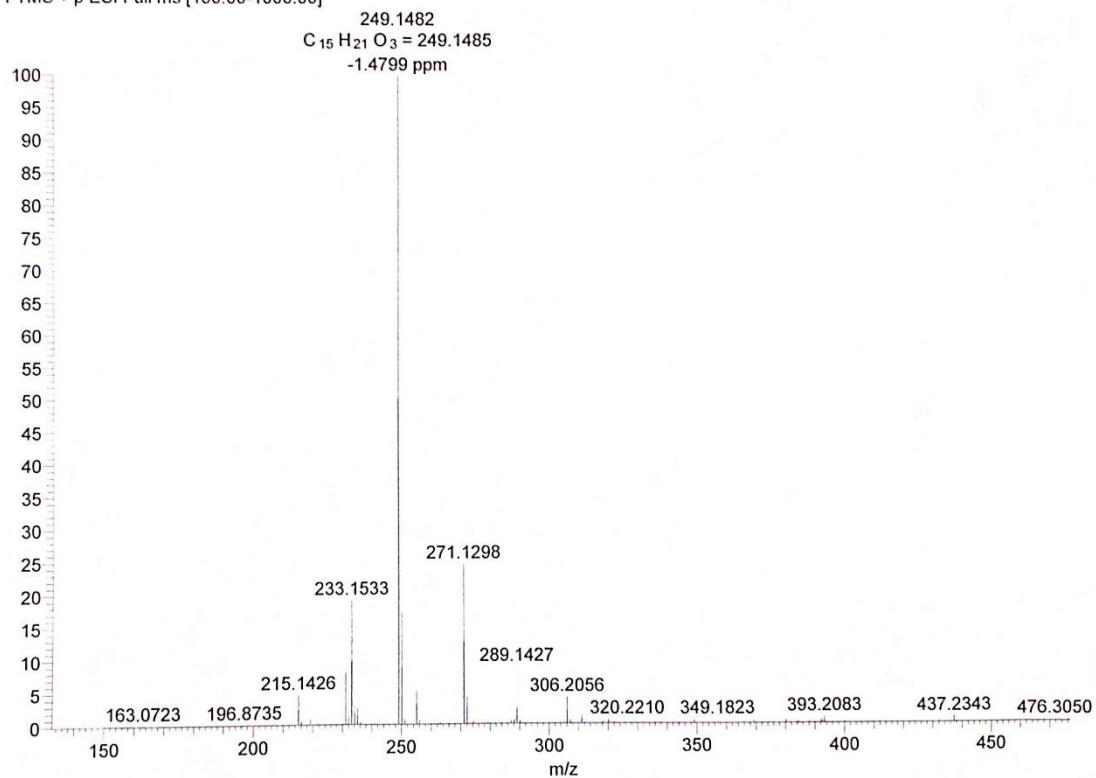

**Figure S38.** The HRESIMS spectrum of compound **5**.

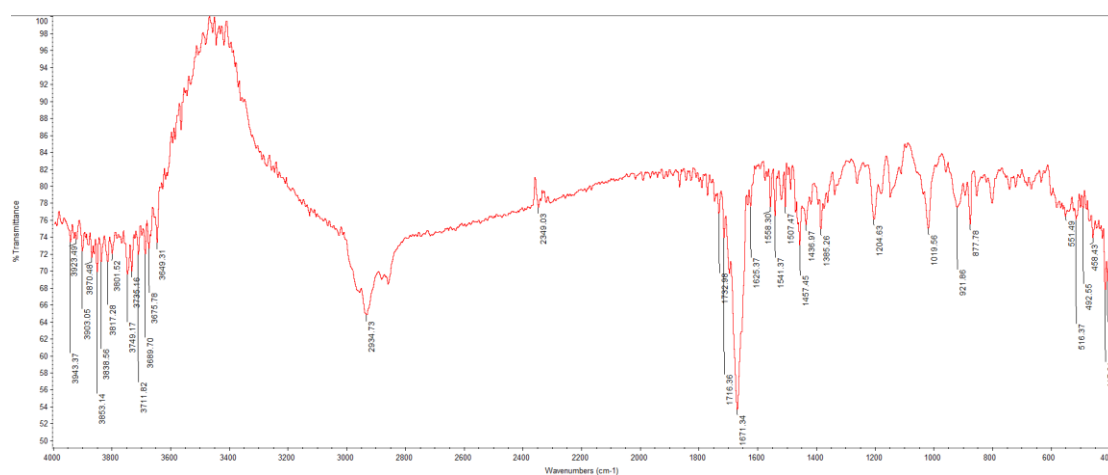

**Figure S39.** The IR spectrum of compound **5**.

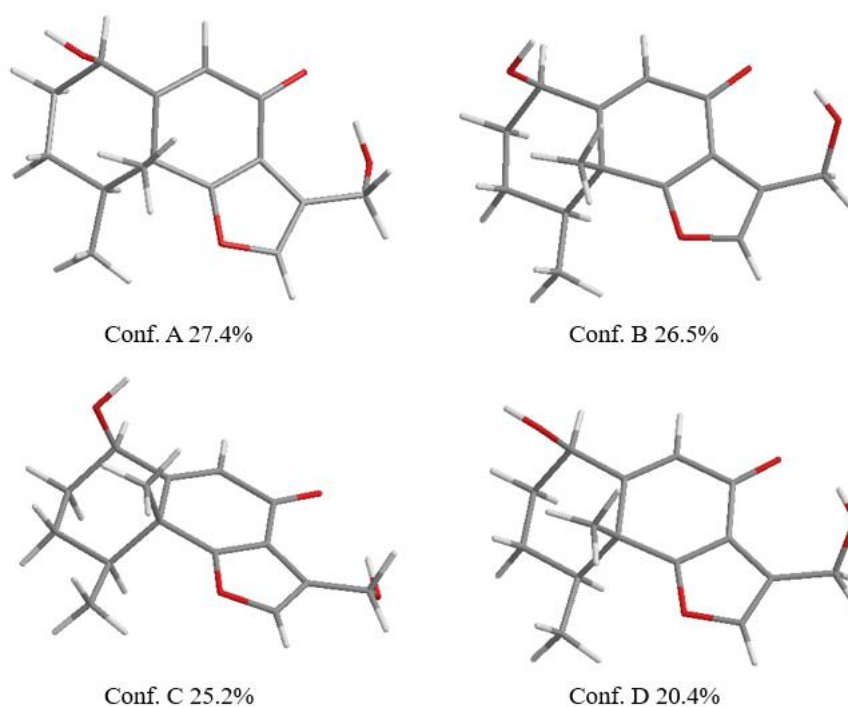

**Figure S40.** DFT-optimized structures for low-energy conformers of (1*R*, 4*S*, 5*R*)-**1** at B3LYP/TZVP level in DMSO (CPCM) (Conformer populations were calculated using the Gibbs free energy and Boltzmann population at 298 K estimated thereof).

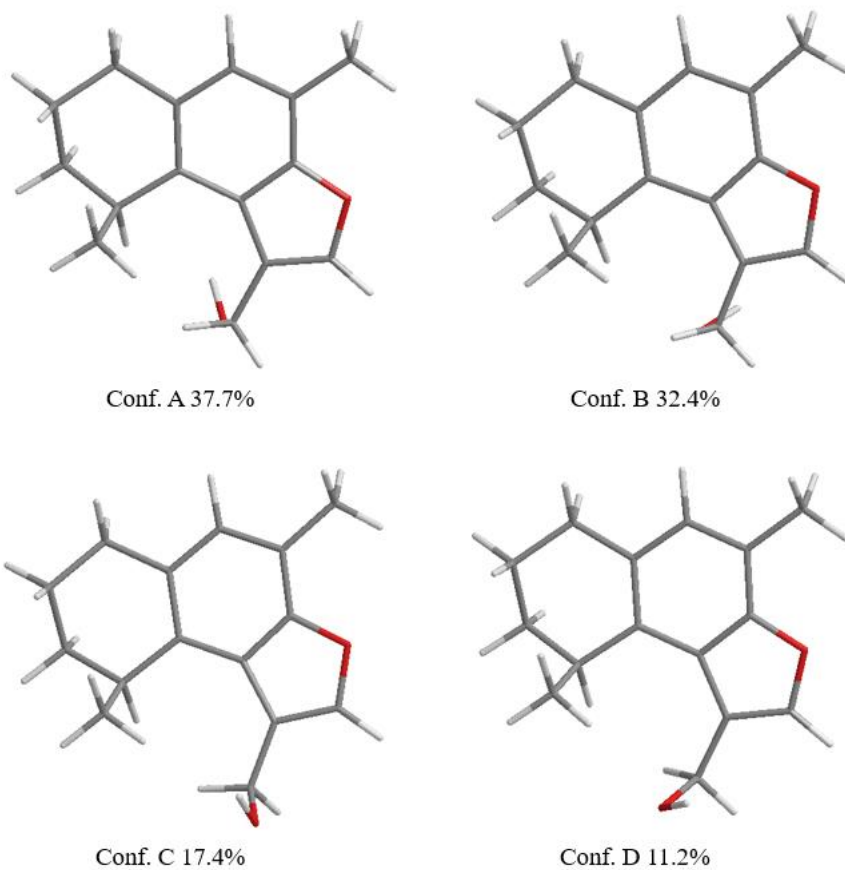

**Figure S41.** DFT-optimized structures for low-energy conformers of (4*R*)-**2** at B3LYP/TZVP level in DMSO (CPCM) (Conformer populations were calculated using the Gibbs free energy and Boltzmann population at 298 K estimated thereof).



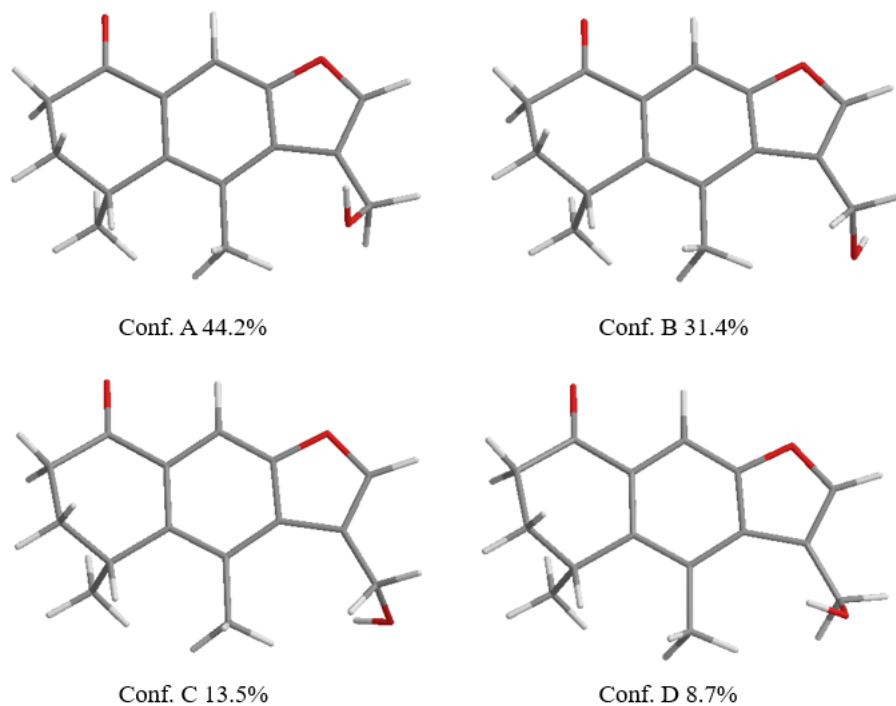

**Figure S42.** DFT-optimized structures for low-energy conformers of (4R)-3 at B3LYP/TZVP level in DMSO (CPCM) (Conformer populations were calculated using the Gibbs free energy and Boltzmann population at 298 K estimated thereof).

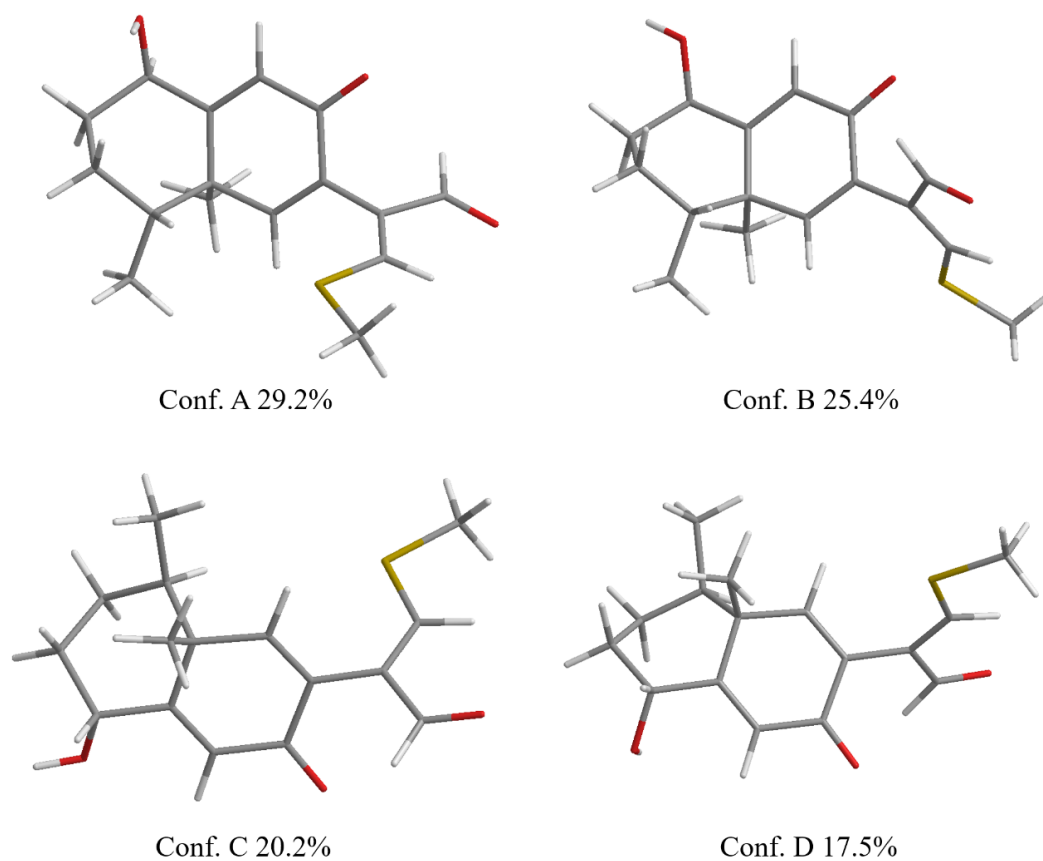

**Figure S43.** DFT-optimized structures for low-energy conformers of (4*R*)-**4** at B3LYP/TZVP level in DMSO (CPCM) (Conformer populations were calculated using the Gibbs free energy and Boltzmann population at 298 K estimated thereof).

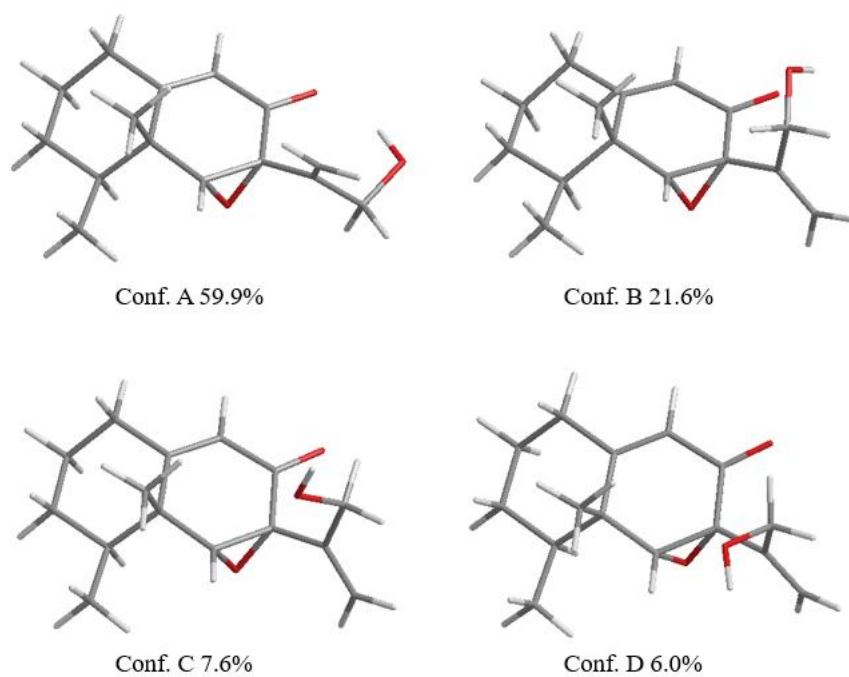

**Figure S44.** DFT-optimized structures for low-energy conformers of (4*S*,5*R*,6*R*,7*R*)-**5**

at B3LYP/TZVP level in DMSO (CPCM) (Conformer populations were calculated using the Gibbs free energy and Boltzmann population at 298 K estimated thereof).

| Conformations | Frequencies |         |         |
|---------------|-------------|---------|---------|
|               | 1           | 2       | 3       |
| A             | 46.2460     | 61.6322 | 93.1044 |
| B             | 45.9745     | 61.4710 | 94.3548 |
| C             | 49.0526     | 61.3063 | 91.5809 |
| D             | 45.5606     | 62.5549 | 94.2921 |

**Table S1.** Harmonic frequencies (cm<sup>-1</sup>) of **1**.

| Conformations | Frequencies |         |         |
|---------------|-------------|---------|---------|
|               | 1           | 2       | 3       |
| A             | 67.1076     | 77.8603 | 93.8040 |
| B             | 63.8522     | 79.6450 | 94.4259 |
| C             | 56.1423     | 74.2237 | 87.9819 |
| D             | 32.3779     | 71.3376 | 88.5621 |

**Table S2.** Harmonic frequencies (cm<sup>-1</sup>) of **2**.

| Conformations | Frequencies |         |         |
|---------------|-------------|---------|---------|
|               | 1           | 2       | 3       |
| A             | 50.2389     | 53.1863 | 73.1078 |
| B             | 51.6273     | 55.2291 | 82.2034 |
| C             | 39.4457     | 53.4979 | 73.1831 |
| D             | 48.8863     | 56.5290 | 83.2251 |

**Table S3.** Harmonic frequencies (cm<sup>-1</sup>) of **3**.

| Conformations | Frequencies |         |         |
|---------------|-------------|---------|---------|
|               | 1           | 2       | 3       |
| A             | 24.1409     | 37.0744 | 54.0982 |

|   |         |         |         |
|---|---------|---------|---------|
| B | 20.6730 | 40.0519 | 57.5593 |
| C | 25.1176 | 37.2193 | 54.8739 |
| D | 21.1952 | 40.7051 | 57.6114 |

**Table S4.** Harmonic frequencies (cm<sup>-1</sup>) of **4**.

| Conformations | Frequencies |         |         |
|---------------|-------------|---------|---------|
|               | 1           | 2       | 3       |
| A             | 39.6984     | 54.1896 | 83.1232 |
| B             | 40.4606     | 43.0203 | 82.7451 |
| C             | 33.1236     | 54.1258 | 60.0852 |
| D             | 28.4078     | 52.0435 | 60.7965 |

**Table S5.** Harmonic frequencies (cm<sup>-1</sup>) of **5**.

| Conformations | E+ZPE       | G           | %    |
|---------------|-------------|-------------|------|
| A             | -883.034519 | -883.077920 | 27.4 |
| B             | -883.035662 | -883.078906 | 26.5 |
| C             | -883.035786 | -883.079093 | 25.2 |
| D             | -883.034512 | -883.077911 | 20.4 |
|               |             |             |      |

**Table S6.** Important thermodynamic parameters (a.u.) and Boltzmann distributions of the optimized-1 at B3LYP/TZVP level of theory with PCM solvent model for DMSO. E+ZPE, G: total energy with zero-point energy (ZPE) and Gibbs free energy at B3LYP/TZVP level of theory with PCM solvent model for DMSO. %: Boltzmann distributions, using the relative Gibbs free energies as weighting factors

| Conformations | E+ZPE       | G           | %    |
|---------------|-------------|-------------|------|
| A             | -732.614420 | -732.656399 | 37.7 |
| B             | -732.616380 | -732.658410 | 32.4 |
| C             | -732.612141 | -732.654485 | 17.4 |
| D             | -732.613909 | -732.656465 | 11.2 |

**Table S7.** Important thermodynamic parameters (a.u.) and Boltzmann distributions of the optimized-2 at B3LYP/TZVP level of theory with PCM solvent model for DMSO.

| Conformations | E+ZPE       | G           | %    |
|---------------|-------------|-------------|------|
| A             | -806.660788 | -806.703905 | 44.2 |
| B             | -806.660883 | -806.703900 | 31.4 |
| C             | -806.658457 | -806.701935 | 13.5 |

|   |             |             |     |
|---|-------------|-------------|-----|
| D | -806.658376 | -806.701177 | 8.7 |
|---|-------------|-------------|-----|

**Table S8.** Important thermodynamic parameters (a.u.) and Boltzmann distributions of the optimized-3 at B3LYP/TZVP level of theory with PCM solvent model for DMSO.

| Conformations | E+ZPE        | G            | %    |
|---------------|--------------|--------------|------|
| A             | -1245.272181 | -1245.322236 | 29.2 |
| B             | -1245.272372 | -1245.322440 | 25.4 |
| C             | -1245.272161 | -1245.322083 | 20.2 |
| D             | -1245.272195 | -1245.322129 | 17.5 |

**Table S9.** Important thermodynamic parameters (a.u.) and Boltzmann distributions of the optimized-4 at B3LYP/TZVP level of theory with PCM solvent model for DMSO.

| Conformations | E+ZPE       | G           | %    |
|---------------|-------------|-------------|------|
| A             | -808.959176 | -809.002888 | 59.9 |
| B             | -808.957473 | -809.001675 | 21.6 |
| C             | -808.957153 | -809.001814 | 7.6  |
| D             | -808.957633 | -809.002222 | 6.0  |

**Table S10.** Important thermodynamic parameters (a.u.) and Boltzmann distributions of the optimized-5 at B3LYP/TZVP level of theory with PCM solvent model for DMSO.
